# Supplementary material
Source: ML conference proceedings conference paper supplement (https://proceedings.neurips.cc/paper_files/paper/2023/hash/411fa9d368b5485be4c6bb62615b365e-Abstract.html)
Supplement: Supplementary file 1 [file 411fa9d368b5485be4c6bb62615b365e-Supplemental-Conference.pdf]

---

# On kernel-based statistical learning theory in the mean field limit

---

Anonymous Author(s)

Affiliation

Address

email

## Abstract

In many applications of machine learning, a large number of variables are considered. Motivated by machine learning of interacting particle systems, we consider the situation when the number of input variables goes to infinity. First, we continue the recent investigation of the mean field limit of kernels and their reproducing kernel Hilbert spaces, completing the existing theory. Next, we provide results relevant for approximation with such kernels in the mean field limit, including a representer theorem. Finally, we use these kernels in the context of statistical learning in the mean field limit, focusing on Support Vector Machines. In particular, we show mean field convergence of empirical and infinite-sample solutions as well as the convergence of the corresponding risks. On the one hand, our results establish rigorous mean field limits in the context of kernel methods, providing new theoretical tools and insights for large-scale problems. On the other hand, our setting corresponds to a new form of limit of learning problems, which seems to have not been investigated yet in the statistical learning theory literature.

## 1 Introduction

Models with many variables play an important role in many fields of mathematical and physical sciences. In this context, going to the limit of infinitely many variables is an important analysis and modeling approach. A classic example are interacting particle systems; these are usually modeled as dynamical systems describing the temporal evolution of many interacting objects. In physics, such systems were first investigated in the context of gas dynamics, cf. [11]. Since even small volumes of gases typically contain an enormous number of molecules, a microscopic modeling approach quickly becomes infeasible and one considers the evolution of densities instead [12]. In the past decades, interacting particle systems arising from many different domains have been considered, for example, animal movement [4, 23], social and political dynamics [31, 10], crowd modeling and control [17, 15, 1], swarms of robots [28, 27, 13] or vehicular traffic [32]. There is now a vast literature on such applications, and we refer to the surveys [26, 33, 21] as starting points. A prototypical example of such a system is given by  $\dot{x}_i = \frac{1}{M} \sum_{j=1}^M \phi(x_i, x_j)(x_j - x_i)$ , for  $i = 1, \dots, M$ , where  $M \in \mathbb{N}_+$  particles or agents are modelled by their state  $x_i \in \mathbb{R}^d$ ,  $i = 1, \dots, M$ , evolving according to some interaction rule  $\phi : \mathbb{R}^d \times \mathbb{R}^d \rightarrow \mathbb{R}$ . Typical questions then concern the long-term behavior of such systems, in particular, emergent phenomena like consensus or alignment [9]. While first-principles modeling has been very successful for interacting particle systems in physical domains, using this approach to model the interaction rules in complex domains like social and opinion dynamics, pedestrian and animal movement or vehicular traffic, can be problematic. Therefore, learning interaction rules from data has been recently intensively investigated, for example, in the pioneering works [6, 25]. The data consists typically of (sampled) trajectories of the particle states, potentially with measurement noise, and the goal is to learn a good approximation of the interaction rule  $\phi$ .

A related question is that of learning a function  $F_M : (\mathbb{R}^d)^M \rightarrow \mathbb{R}$  of the particle states. This corresponds to a (real-valued) feature of a given population, which depends on each individual particle state. Similar to the case of the interaction rule, we might not be able to model such a feature, but we could measure it at different time instants and try to learn this mapping from data. We can formalize this as a standard supervised learning task: The data set consists of  $D_N^{[M]} = ((\vec{x}_1, y_1), \dots, (\vec{x}_N, y_N))$ , where  $\vec{x}_n \in (\mathbb{R}^d)^M$  are snapshot measurements of the particle states (corresponding to the input of the functional) and  $y_n \in \mathbb{R}$  is the value of the functional of interest, potentially with measurement noise, at snapshot state  $\vec{x}_n$ . Let us assume an additive noise model, i.e.,  $y_n = F_M(\vec{x}_n) + \epsilon_n$  for  $n = 1, \dots, N$ , where  $\epsilon_1, \dots, \epsilon_N \in \mathbb{R}$  are noise variables. This is now a regression problem that could be solved for example using a Support Vector Machine (SVM) [30]. Note that for this we need a kernel  $k_M : (\mathbb{R}^d)^M \times (\mathbb{R}^d)^M \rightarrow \mathbb{R}$  on  $(\mathbb{R}^d)^M$ .

Similarly to classical physical examples like gas dynamics, the case of a large number of particles is also relevant in modern complex interacting particle systems. Since this poses computational and modeling challenges, it can be advantageous to go also here to a kinetic level and model the evolution of the particle distribution instead of every individual particle. It is well-established how to derive a kinetic partial differential equation from ordinary differential equations systems on the particle level, for example, using the Boltzmann equation or via a mean field limit, cf. [9] for an overview in the context of multi-agent systems. Formally, instead of trajectories of particle states of the form  $[0, T] \ni t \mapsto \vec{x}(t) \in (\mathbb{R}^d)^M$ , we then have trajectories of probability measures  $[0, T] \ni t \mapsto \mu(t) \in \mathcal{P}(\mathbb{R}^d)$ . This immediately raises the question of whether the learning setup outlined above also allows a corresponding kinetic limit. More precisely, let  $K \subseteq \mathbb{R}^d$  be compact and assume that all particles remain confined to this compactum, i.e.,  $x_i(t) \in K$  for all  $i = 1, \dots, M$  and all  $t \in [0, T]$  under the microscopic dynamics.<sup>1</sup> If the underlying dynamics have a mean field limit, then it is reasonable to assume that the finite-input functionals  $F_M : K^M \rightarrow \mathbb{R}$  converge also in mean field to some  $F : \mathcal{P}(K) \rightarrow \mathbb{R}$  for  $M \rightarrow \infty$ , see Section 2 for a precise definition of this notion. In turn, we can now formulate a corresponding learning problem on the mean field level: A data set is then given by  $D_N = ((\mu_1, y_1), \dots, (\mu_N, y_N))$ , where  $\mu_n \in \mathcal{P}(K)$  are snapshots of the particle state distribution over time and  $y_n \in \mathbb{R}$  are again potentially noisy measurements of the functional. Assuming an additive noise model, this corresponds to  $y_n = F(\mu_n) + \epsilon_n$ ,  $n = 1, \dots, N$ . If we want to use an SVM on the kinetic level, we need a kernel  $k : \mathcal{P}(K) \times \mathcal{P}(K) \rightarrow \mathbb{R}$  on probability distributions. There are several options available for this, see e.g. [14]. However, assuming that all ingredients of the learning problem arise as a mean field limit, this naturally leads to the question of whether a mean field limit of kernels exists, and what this means for the relation of the learning problems on the finite-input and kinetic level. In [18], this reasoning has motivated the introduction and investigation of the mean field limit of kernels. In the present work, we extend the theory of these kernels and investigate them in the context of statistical learning theory. We would like to stress that the technical developments here are independent of the motivation outlined above, in that they apply to mean field limits of functions and kernels that do not necessarily arise from the dynamics of interacting particle systems.

**Contributions** Our contributions cover three closely related aspects. 1) We extend and complete the theory of mean field limit kernels and their RKHSs (Section 2). In Theorem 2.3, we precisely describe the relationship between the RKHS of the finite-input kernels and the RKHS of the mean field kernel, completing the results from [18]. In particular, this allows us to interpret the latter RKHS as the mean field limit of the former RKHSs. Furthermore, in Lemma 2.4 and 2.5, we provide inequalities for the corresponding RKHS norms, which are necessary for  $\Gamma$ -convergence arguments. 2) We provide results relevant for approximation with mean field limit kernels (Section 3). With Proposition 3.1 we give a first result on the approximation power of mean field limit kernels, and in Theorem 3.3 we can also provide a representer theorem for these kernels. For its proof, we use a  $\Gamma$ -convergence argument, which is to the best of our knowledge the first time this technique has been used in the context of kernel methods. 3) We investigate the mean field limit of kernels in the context of statistical learning theory (Section 4). We first establish an appropriate mean field limit setup for statistical learning problems, based on a slightly stronger mean field limit existence result than available so far, cf. Proposition 2.1. To the best of our knowledge, this is a new form of a limit for learning problems. In this setup, we then provide existence, uniqueness, and representer theorems for empirical and (using an apparently new notion of mean field convergence of probability distributions) infinite-sample

<sup>1</sup>This means the dynamics on the level of individual particles.

93 solutions of SVMs, cf. Proposition 4.3 and 4.5. Finally, under a uniformity assumption, we can also  
 94 establish convergence of the minimal risks in Proposition 4.7.

95 Our developments are relevant from two different perspectives: on the one hand, they constitute  
 96 a theoretical proof-of-concept that the mean field limit can be “pulled through” the (kernel-based)  
 97 statistical learning theory setup. In particular, this demonstrates that rigorous theoretical results can  
 98 be transferred through the mean field limit, similar to works in the context of control of interacting  
 99 particle systems, see e.g. [22]. On the other hand, our setup appears to be a new variant of a large-  
 100 number-of-variables limit in the context of machine learning, complementing established settings  
 101 like infinite-width neural networks [2].

102 Due to space constraints, all proofs and some additional technical results have been placed in the  
 103 supplementary material.

## 104 2 Kernels and their RKHSs in the mean field limit

105 **Setup and preliminaries** Let  $(X, d_X)$  be a compact metric space and denote by  $\mathcal{P}(X)$  the set  
 106 of Borel probability measures on  $X$ . We endow  $\mathcal{P}(X)$  with the topology of weak convergence  
 107 of probability measures. Recall that for  $\mu_n, \mu \in \mathcal{P}(X)$ , we say that  $\mu_n \rightarrow \mu$  weakly if for all  
 108 bounded and continuous  $f : X \rightarrow \mathbb{R}$  (since  $X$  is compact, this is equivalent to  $f$  continuous) we have  
 109  $\lim_{n \rightarrow \infty} \int_X \phi(x) d\mu_n(x) \rightarrow \int_X \phi(x) d\mu(x)$ . The topology of weak convergence can be metrized by  
 110 the Kantorowich-Rubinstein metric  $d_{\text{KR}}$ , defined by

$$d_{\text{KR}}(\mu_1, \mu_2) = \sup \left\{ \int_X \phi(x) d(\mu_1 - \mu_2)(x) \mid \phi : X \rightarrow \mathbb{R} \text{ is 1-Lipschitz} \right\}.$$

111 Note that since  $X$  is compact and hence separable, the Kantorowich-Rubinstein metric is equal to the 1-  
 112 Wasserstein metric here. Furthermore,  $\mathcal{P}(X)$  is compact in this topology. For  $M \in \mathbb{N}_+$  and  $\vec{x} \in X^M$ ,  
 113 denote the  $i$ -th component of  $\vec{x}$  by  $x_i$ , and define the *empirical measure* for  $\vec{x}$  by  $\hat{\mu}[\vec{x}] = \frac{1}{M} \sum_{i=1}^M \delta_{x_i}$ ,  
 114 where  $\delta_x$  denotes the Dirac measure centered at  $x \in X$ . The empirical measures are dense in  $\mathcal{P}(X)$   
 115 w.r.t. the Kantorowich-Rubinstein metric. Additionally, define  $d_{\text{KR}}^2 : \mathcal{P}(X)^2 \times \mathcal{P}(X)^2 \rightarrow \mathbb{R}_{\geq 0}$   
 116 by  $d_{\text{KR}}^2((\mu_1, \mu'_1), (\mu_2, \mu'_2)) = d_{\text{KR}}(\mu_1, \mu_2) + d_{\text{KR}}(\mu'_1, \mu'_2)$ , and note that  $(\mathcal{P}(X)^2, d_{\text{KR}}^2)$  is a compact  
 117 metric space. Moreover, denote the set of permutations on  $\{1, \dots, M\}$  by  $\mathcal{S}_M$ , and for a tuple  
 118  $\vec{x} \in X^M$  and permutation  $\sigma \in \mathcal{S}_M$  define  $\sigma\vec{x} = (x_{\sigma(1)}, \dots, x_{\sigma(M)})$ . Finally, we recall some  
 119 well-known definitions and results from the theory of reproducing kernel Hilbert spaces, following  
 120 [30, Chapter 4]. For an arbitrary set  $\mathcal{X} \neq \emptyset$  and a Hilbert space  $(H, \langle \cdot, \cdot \rangle_H)$  of functions on  $\mathcal{X}$ , we  
 121 say that a map  $k : \mathcal{X} \times \mathcal{X} \rightarrow \mathbb{R}$  is a *reproducing kernel* for  $H$  if 1)  $k(\cdot, x) \in H$  for all  $x \in \mathcal{X}$ ;  
 122 2) for all  $x \in \mathcal{X}$  and  $f \in H$  we have  $f(x) = \langle f, k(\cdot, x) \rangle_H$ . Note that if a reproducing kernel  
 123 exists, it is unique. If such a Hilbert space has a reproducing kernel, we call  $H$  a reproducing kernel  
 124 Hilbert space (RKHS) and  $k$  its (reproducing) kernel. It is well-known that a reproducing kernel is  
 125 symmetric and positive semidefinite, and that every symmetric and positive semidefinite function has  
 126 a unique RKHS for which it is the reproducing kernel. For brevity, if  $k$  is symmetric and positive  
 127 semidefinite, or equivalently, if it is the reproducing kernel of an RKHS, we call  $k$  simply a kernel,  
 128 and denote by  $(H_k, \langle \cdot, \cdot \rangle_k)$  its unique associated RKHS. Define also  $H_k^{\text{pre}} = \text{span}\{k(\cdot, x) \mid x \in \mathcal{X}\}$ ,  
 129 then for  $f = \sum_{n=1}^N \alpha_n k(\cdot, x_n) \in H_k^{\text{pre}}$  and  $g = \sum_{m=1}^M \beta_m k(\cdot, y_m) \in H_k^{\text{pre}}$  we have  $\langle f, g \rangle_k =$   
 130  $\sum_{n=1}^N \sum_{m=1}^M \alpha_n \beta_m k(y_m, x_n)$ , and  $H_k^{\text{pre}}$  is dense in  $H_k$ .

131 **The mean field limit of functions and kernels** Given  $f_M : X^M \rightarrow \mathbb{R}$ ,  $M \in \mathbb{N}_+$ , and  $f : \mathcal{P}(X) \rightarrow$   
 132  $\mathbb{R}$ , we say that  $f_M$  *converges in mean field* to  $f$  and that  $f$  is the (or a) *mean field limit* of  $f_M$ , if  
 133  $\lim_{M \rightarrow \infty} \sup_{\vec{x} \in X^M} |f_M(\vec{x}) - f(\hat{\mu}[\vec{x}])| = 0$ . In this case, we write  $f_M \xrightarrow{\mathcal{P}_1} f$ . Let now  $(Y, d_Y)$  be  
 134 another metric space and  $f_M : X^M \times Y \rightarrow \mathbb{R}$ ,  $M \in \mathbb{N}_+$ , and  $f : \mathcal{P}(X) \times Y \rightarrow \mathbb{R}$ , then we say that  
 135  $f_M$  *converges in mean field* to  $f$  and that  $f$  is the (or a) *mean field limit* of  $f_M$ , if for all compact  
 136  $K \subseteq Y$  we have

$$\lim_{M \rightarrow \infty} \sup_{\vec{x} \in X^M, y \in K} |f_M(\vec{x}, y) - f(\hat{\mu}[\vec{x}], y)| = 0. \quad (1)$$

137 and also write  $f_M \xrightarrow{\mathcal{P}_1} f$ . The following existence results for mean field limits is slightly more  
 138 general than what is available in the literature, and it is essentially a direct generalization of [7,  
 139 Theorem 2.1], in the form of [8, Lemma 1.2].

**Proposition 2.1.** Let  $(X, d_X)$  be a compact metric space and  $(Z, d_Z)$  a metric space that has a countable basis  $(U_n)_n$  such that  $\bar{U}_n$  is compact for all  $n \in \mathbb{N}$ . Let  $f_M : X^M \times Z \rightarrow \mathbb{R}$ ,  $M \in \mathbb{N}_+$ , be a sequence of functions fulfilling the following conditions: 1) (*Symmetry in  $\vec{x}$* )<sup>2</sup> For all  $M \in \mathbb{N}_+$ ,  $\vec{x} \in X^M$ ,  $z \in Z$  and permutations  $\sigma \in \mathcal{S}_M$ , we have  $f_M(\sigma\vec{x}, z) = f_M(\vec{x}, z)$ ; 2) (*Uniform boundedness*) There exists  $B_f \in \mathbb{R}_{\geq 0}$  and a function  $b : Z \rightarrow \mathbb{R}_{\geq 0}$  such that  $\forall M \in \mathbb{N}_+$ ,  $\vec{x} \in X^M$ ,  $z \in Z$  :  $|f_M(\vec{x}, z)| \leq B_f + b(z)$ ; 3) (*Uniform Lipschitz continuity*) There exists some  $L_f \in \mathbb{R}_{> 0}$  such that for all  $M \in \mathbb{N}_+$ ,  $\vec{x}_1, \vec{x}_2 \in X^M$ ,  $z_1, z_2 \in Z$  we have  $|f_M(\vec{x}_1, z_1) - f_M(\vec{x}_2, z_2)| \leq L_f (d_{\text{KR}}(\hat{\mu}[\vec{x}_1], \hat{\mu}[\vec{x}_2]) + d_Z(z_1, z_2))$ .

Then there exists a subsequence  $(f_{M_\ell})_\ell$  and a continuous function  $f : \mathcal{P}(X) \times Z \rightarrow \mathbb{R}$  such that  $f_{M_\ell} \xrightarrow{\mathcal{P}_1} f$  for  $\ell \rightarrow \infty$ . Furthermore,  $f$  is  $L_f$ -Lipschitz continuous and there exists  $B_F \in \mathbb{R}_{\geq 0}$  such that for all  $\mu \in \mathcal{P}(X)$ ,  $z \in Z$  we have  $|f(\mu, z)| \leq B_F + b(z)$ .

We now turn to the mean field limit of kernels as introduced in [18]: Given  $k_M : X^M \times X^M \rightarrow \mathbb{R}$  and  $k : \mathcal{P}(X) \times \mathcal{P}(X) \rightarrow \mathbb{R}$ , we say that  $k_M$  *converges in mean field* to  $k$  and that  $k$  is the (or a) *mean field limit* of  $k_M$ , if

$$\lim_{M \rightarrow \infty} \sup_{\vec{x}, \vec{x}' \in X^M} |k_M(\vec{x}, \vec{x}') - k(\hat{\mu}[\vec{x}], \hat{\mu}[\vec{x}'])| = 0. \quad (2)$$

In this case we write  $k_M \xrightarrow{\mathcal{P}_1} k$ .

For convenience, we recall [18, Theorem 2.1], which ensures the existence of a mean field limit of a sequence of kernels.

**Proposition 2.2.** Let  $k_M : X^M \times X^M \rightarrow \mathbb{R}$  be a sequence of kernels fulfilling the following conditions. 1) (*Symmetry in  $\vec{x}$* ) For all  $M \in \mathbb{N}_+$ ,  $\vec{x}, \vec{x}' \in X^M$  and permutations  $\sigma \in \mathcal{S}_M$  we have  $k_M(\sigma\vec{x}, \vec{x}') = k_M(\vec{x}, \vec{x}')$ ; 2) (*Uniform boundedness*) There exists  $C_k \in \mathbb{R}_{\geq 0}$  such that  $\forall M \in \mathbb{N}_+$ ,  $\vec{x}, \vec{x}' \in X^M$  :  $|k_M(\vec{x}, \vec{x}')| \leq C_k$ ; 3) (*Uniform Lipschitz continuity*) There exists some  $L_k \in \mathbb{R}_{> 0}$  such that for all  $M \in \mathbb{N}_+$ ,  $\vec{x}_1, \vec{x}'_1, \vec{x}_2, \vec{x}'_2 \in X^M$  we have  $|k_M(\vec{x}_1, \vec{x}'_1) - k_M(\vec{x}_2, \vec{x}'_2)| \leq L_k d_{\text{KR}}[(\hat{\mu}[\vec{x}_1], \hat{\mu}[\vec{x}'_1]), (\hat{\mu}[\vec{x}_2], \hat{\mu}[\vec{x}'_2])]$ .

Then there exists a subsequence  $(k_{M_\ell})_\ell$  and a continuous kernel  $k : \mathcal{P}(X) \times \mathcal{P}(X) \rightarrow \mathbb{R}$  such that  $k_{M_\ell} \xrightarrow{\mathcal{P}_1} k$ , and  $k$  is also bounded by  $C_k$ .

Let  $k_M : X^M \times X^M \rightarrow \mathbb{R}$  be a given sequence of kernels fulfilling the conditions of Proposition 2.2. Then there exists a subsequence  $(k_{M_\ell})_\ell$  converging in mean field to a kernel  $k : \mathcal{P}(X) \times \mathcal{P}(X) \rightarrow \mathbb{R}$ . From now on, we only consider this subsequence and denote it again by  $(k_M)_M$ , i.e.,  $k_M \xrightarrow{\mathcal{P}_1} k$ . Unless noted otherwise, every time we need a further subsequence, we will make this explicit.<sup>3</sup>

**The RKHS of the mean field limit kernel** Denote by  $H_M := H_{k_M}$  the (unique) RKHS corresponding to kernel  $k_M$  and denote by  $H_k$  the unique RKHS of  $k$ . For basic properties of these objects as well as classes of suitable kernels we refer to [18].

We clarify the relation between  $H_M$  and  $H_k$  in the next result.

**Theorem 2.3.** 1) For every  $f \in H_k$ , there exists a sequence  $f_M \in H_M$ ,  $M \in \mathbb{N}_+$ , such that  $f_M \xrightarrow{\mathcal{P}_1} f$ . 2) Let  $f_M \in H_M$  be sequence such that there exists  $B \in \mathbb{R}_{\geq 0}$  with  $\|f_M\|_M \leq B$  for all  $M \in \mathbb{N}_+$ . Then there exists a subsequence  $(f_{M_\ell})_\ell$  and  $f \in H_k$  with  $f_{M_\ell} \xrightarrow{\mathcal{P}_1} f$  and  $\|f\|_k \leq B$ .

In other words, on the one hand, every RKHS function from  $H_k$  arises as a mean field limit of RKHS functions from  $H_M$ . On the other hand, every uniformly norm-bounded sequence of RKHS functions  $(f_M)_M$  has a mean field limit in  $H_k$ .

Note that the preceding result is considerably stronger than the corresponding results in [18]: In contrast to [18, Theorem 4.4] we do not need to go to another subsequence in the first item, and

<sup>2</sup>As is well-known, cf. [8, Remark 1.1.3], this condition is actually implied by the next condition. However, as usual in the kinetic theory literature, we kept this condition for emphasis.

<sup>3</sup>It is customary in the kinetic theory literature to switch to such a subsequence. However, for some results that are about to follow, it is important that no further switch to a subsequence happens, hence we need to be more explicit in these cases.

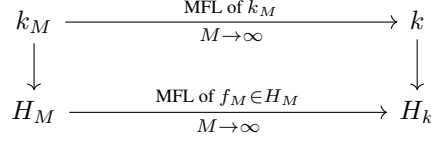

Figure 1: The kernel  $k$  arises as the mean field limit (MFL) of the kernels  $k_M$  (Proposition 2.2). Every uniformly norm-bounded sequence  $f_M \in H_M$ ,  $M \in \mathbb{N}_+$ , has an MFL in  $H_k$ , and every function  $f \in H_k$  arises as such an MFL (Theorem 2.3). Based on [18, Figure 1].

we ensure that the mean field limit  $f$  is contained in  $H_k$  (and norm-bounded by the same uniform bound), which was missing from Corollary 4.3 in the same reference.

The relation between the kernels  $k_M$  and their RKHSs  $H_M$ , and the mean field limit kernel  $k$  and its RKHS  $H_k$  is illustrated as a commutative diagram in Figure 1. In order to arrive at the mean field RKHS  $H_k$ , on the one hand, we consider the mean field limit  $k$  of the  $k_M$ , and then form the corresponding RKHS  $H_k$ . This is essentially the content of Proposition 2.2. On the other hand, we can first go from the kernel  $k_M$  to the associated unique RKHS  $H_M$  (for each  $M \in \mathbb{N}_+$ ). Theorem 2.3 then says that  $H_k$  can be interpreted as a mean field limit of the RKHSs  $H_M$ , since every function in  $H_k$  arises as a mean field limit of a sequence of functions from the  $H_M$ , and every uniformly norm-bounded sequence of such functions has a mean field limit that is in  $H_k$ .

Next, we state two technical results that will play an important role in the following developments, and which might be of independent interest. They describe  $\liminf$  and  $\limsup$  inequalities required for  $\Gamma$ -convergence arguments used later on.

**Lemma 2.4.** Let  $f_M \in H_M$ ,  $M \in \mathbb{N}_+$ , and  $f \in H_k$  such that  $f_M \xrightarrow{\mathcal{P}_1} f$ , then

$$\|f\|_k \leq \liminf_{M \rightarrow \infty} \|f_M\|_M. \quad (3)$$

**Lemma 2.5.** Let  $f \in H_k$ . Then there exist  $f_M \in H_M$ ,  $M \in \mathbb{N}_+$ , such that  $\lim_{M \rightarrow \infty} \sup_{\vec{x} \in X^M} |f_M(\vec{x}) - f(\hat{\mu}[\vec{x}])| = 0$ , and

$$\limsup_{M \rightarrow \infty} \|f_M\|_M \leq \|f\|_k. \quad (4)$$

### 3 Approximation with kernels in the mean field limit

Kernel-based machine learning methods use in general an RKHS as the hypothesis space, and learning often reduces to a search or optimization problem over this function space. For this reason, it is important to investigate the approximation properties of a given kernel and its associated RKHS as well as to ensure that the learning problem over an RKHS (which is in general an infinite-dimensional object) can be tackled with finite computations.

The next result asserts that, under a uniformity condition, the approximation power of the finite-input kernels  $k_M$  is inherited by the mean field limit kernel.

**Proposition 3.1.** For  $M \in \mathbb{N}_+$ , let  $\mathcal{F}_M$  be the set of symmetric functions that are continuous w.r.t.  $(\vec{x}, \vec{x}') \mapsto d_{\text{KR}}(\hat{\mu}[\vec{x}], \hat{\mu}[\vec{x}'])$ . Let  $\mathcal{F} \subseteq C^0(\mathcal{P}(X), \mathbb{R})$  such that for all  $f \in \mathcal{F}$  and  $\epsilon > 0$  there exist  $B \in \mathbb{R}_{\geq 0}$  and sequences  $f_M \in \mathcal{F}_M$ ,  $\hat{f}_M \in H_M$ ,  $M \in \mathbb{N}_+$ , such that 1)  $f_M \xrightarrow{\mathcal{P}_1} f$  2)  $\|f_M - \hat{f}_M\|_\infty \leq \epsilon$  for all  $M \in \mathbb{N}_+$  3)  $\|\hat{f}_M\|_M \leq B$  for all  $M \in \mathbb{N}_+$ . Then for all  $f \in \mathcal{F}$  and  $\epsilon > 0$ , there exists  $\hat{f} \in H_k$  with  $\|f - \hat{f}\|_\infty \leq \epsilon$ .

Intuitively, the set  $\mathcal{F}$  consists of all continuous functions on  $\mathcal{P}(X)$  that arise as a mean field limit of functions which can be uniformly approximated by uniformly norm-bounded RKHS functions. The result then states (to use a somewhat imprecise terminology) that the RKHS  $H_k$  is dense in  $\mathcal{F}$ . We can interpret this as an appropriate mean field variant of the universality property of kernels: a kernel on a compact metric space is called universal if its associated RKHS is dense w.r.t. the supremum norm in the space of continuous functions, and many common kernels are universal, cf. e.g. [30, Section 4.6]. In our setting, ideally universality of the finite-input kernels  $k_M$  is inherited by the mean field limit kernel  $k$ . However, since the mean field limit can be interpreted as a form of smoothing limit, some uniformity requirements should be expected. Proposition 3.1 provides exactly such a condition.

**Remark 3.2.** In Proposition 3.1, the set  $\mathcal{F}$  is a subvectorspace of  $C^0(\mathcal{P}(X), \mathbb{R})$ . Furthermore, if the  $\mathcal{P}_1$ -convergence in the definition of  $\mathcal{F}$  is uniform, then  $\mathcal{F}$  is closed.

Since  $k_M$  and  $k$  are kernels, we have the usual representer theorem for their corresponding RKHSs, cf. e.g. [29]. A natural question is then whether we have mean field convergence of the minimizers and their representation. This is clarified by the next result.

**Theorem 3.3.** Let  $N \in \mathbb{N}_+$ ,  $\mu_1, \dots, \mu_N \in \mathcal{P}(X)$  and for  $n = 1, \dots, N$  let  $\vec{x}_n^{[M]} \in X^M$ ,  $M \in \mathbb{N}_+$ , such that  $\hat{\mu}[\vec{x}_n^{[M]}] \xrightarrow{d_{KR}} \mu_n$  for  $M \rightarrow \infty$ . Let  $L : \mathbb{R}^N \rightarrow \mathbb{R}_{\geq 0}$  be continuous and strictly convex and  $\lambda > 0$ . For each  $M \in \mathbb{N}_+$  consider the problem

$$\min_{f \in H_M} L(f(\vec{x}_1^{[M]}), \dots, f(\vec{x}_N^{[M]})) + \lambda \|f\|_M, \quad (5)$$

as well as the problem

$$\min_{f \in H_k} L(f(\mu_1), \dots, f(\mu_N)) + \lambda \|f\|_k. \quad (6)$$

Then for each  $M \in \mathbb{N}_+$  problem (5) has a unique solution  $f_M^*$ , which is of the form  $f_M^* = \sum_{n=1}^N \alpha_n^{[M]} k_M(\cdot, \vec{x}_n^{[M]}) \in H_M$ , with  $\alpha_1^{[M]}, \dots, \alpha_N^{[M]} \in \mathbb{R}$ , and problem (6) has a unique solution  $f^*$ , which is of the form  $f^* = \sum_{n=1}^N \alpha_n k(\cdot, \mu_n) \in H_k$ , with  $\alpha_1, \dots, \alpha_N \in \mathbb{R}$ . Furthermore, there exists a subsequence  $(f_{M_\ell}^*)_\ell$  such that  $f_{M_\ell}^* \xrightarrow{\mathcal{P}_1} f^*$  and

$$L(f_{M_\ell}^*(\vec{x}_1^{[M_\ell]}), \dots, f_{M_\ell}^*(\vec{x}_N^{[M_\ell]})) + \lambda \|f_{M_\ell}^*\|_{M_\ell} \rightarrow L(f^*(\mu_1), \dots, f^*(\mu_N)) + \lambda \|f^*\|_k. \quad (7)$$

for  $\ell \rightarrow \infty$ .

The main point of this result is the convergence of the minimizers, which we will establish using a  $\Gamma$ -convergence argument. This approach seems to have been introduced by [20, 6, 19] originally in the context of multi-agent systems.

**Remark 3.4.** An inspection of the proof reveals that in Theorem 3.3 we can replace the term  $\lambda \|\cdot\|_M$  and  $\lambda \|\cdot\|_k$  by  $\Omega(\|\cdot\|_M)$  and  $\Omega(\|\cdot\|_k)$ , where  $\Omega : \mathbb{R}_{\geq 0} \rightarrow \mathbb{R}_{\geq 0}$  is a nonnegative, strictly increasing and continuous function.

## 4 Support Vector Machines with mean field limit kernels

We now turn to the mean field limit of kernels in the context of statistical learning theory, focusing on SVMs. We first briefly recall the standard setup of statistical learning theory, and formulate an appropriate mean field limit thereof. We then investigate empirical and infinite-sample solutions of SVMs and their mean field limits, as well as the convergence of the corresponding risks.

**Statistical learning theory setup** We now introduce the standard setup of statistical learning theory, following mostly [30, Chapters 2 and 5]. Let  $\mathcal{X} \neq \emptyset$  (associated with some  $\sigma$ -algebra) and  $\emptyset \neq Y \subseteq \mathbb{R}$  closed (associated with the corresponding Borel  $\sigma$ -algebra). A *loss function* is in this setting a measurable function  $\ell : \mathcal{X} \times Y \times \mathbb{R} \rightarrow \mathbb{R}_{\geq 0}$ . Let  $P$  be a probability distribution on  $\mathcal{X} \times Y$  and  $f : \mathcal{X} \rightarrow \mathbb{R}$  a measurable function, then the *risk of  $f$  w.r.t.  $P$  and loss function  $\ell$*  is defined by

$$\mathcal{R}_{\ell, P}(f) = \int_{\mathcal{X} \times Y} \ell(x, y, f(x)) dP.$$

Note that this is always well-defined since  $(x, y) \mapsto \ell(x, y, f(x))$  is a measurable and nonnegative function. For a set  $H \subseteq \mathbb{R}^{\mathcal{X}}$  of measurable functions we also define the *minimal risk over  $H$*  by

$$\mathcal{R}_{\ell, P}^{H*} = \inf_{f \in H} \mathcal{R}_{\ell, P}(f).$$

If  $H$  is a normed vector space, we additionally define the *regularized risk of  $f \in H$*  and the *minimal regularized risk over  $H$*  by

$$\mathcal{R}_{\ell, P, \lambda}(f) = \mathcal{R}_{\ell, P}(f) + \lambda \|f\|_H^2, \quad \mathcal{R}_{\ell, P, \lambda}^{H*} = \inf_{f \in H} \mathcal{R}_{\ell, P, \lambda}(f),$$

where  $\lambda \in \mathbb{R}_{>0}$  is the *regularization parameter*. A data set of size  $N \in \mathbb{N}_+$  is a tuple  $D_N = ((x_1, y_1), \dots, (x_N, y_N)) \in (\mathcal{X} \times Y)^N$  and for a function  $f : \mathcal{X} \rightarrow \mathbb{R}$  we define its *empirical risk* by

$$\mathcal{R}_{\ell, D_N}(f) = \frac{1}{N} \sum_{n=1}^N \ell(x_n, y_n, f(x_n)).$$

If  $H$  is a normed vector space and  $f \in H$ , we define additionally the *regularized empirical risk* and the *minimal regularized empirical risk over  $H$*  by

$$\mathcal{R}_{\ell, D_N, \lambda}(f) = \mathcal{R}_{\ell, D_N}(f) + \lambda \|f\|_H^2, \quad \mathcal{R}_{\ell, D_N, \lambda}^{H*} = \inf_{f \in H} \mathcal{R}_{\ell, D_N, \lambda}(f),$$

where  $\lambda \in \mathbb{R}_{>0}$  is again the regularization parameter. Note that the notation for the empirical risks is consistent with the risk w.r.t. a probability distribution  $P$ , if we identify a data set  $D_N$  by the corresponding empirical distribution  $\frac{1}{N} \sum_{n=1}^N \delta_{(x_n, y_n)}$ .

In the following,  $H$  will be a RKHS and a minimizer (assuming existence and uniqueness) of  $\mathcal{R}_{\ell, D_N, \lambda}^{H*}$  will be called an *infinite-sample support vector machine (SVM)*. Similarly,  $\mathcal{R}_{\ell, D_N, \lambda}^{H*}$  will be called the *empirical solution of the SVM w.r.t. the data set  $D_N$* .

**Statistical learning theory setup in the mean field limit** Let now  $\emptyset \neq Y \subseteq \mathbb{R}$  be compact and  $\ell_M : X^M \times Y \times \mathbb{R} \rightarrow \mathbb{R}_{\geq 0}$ ,  $M \in \mathbb{N}$ , such that 1)  $\ell_M(\sigma \vec{x}, y, t) = \ell_M(\vec{x}, y, t)$  for all  $\vec{x} \in X^M$ ,  $\sigma \in \mathcal{S}_M$ ,  $y \in Y$ ,  $t \in \mathbb{R}$ ; 2) there exists  $C_\ell \in \mathbb{R}_{\geq 0}$  and a nondecreasing function  $b : \mathbb{R}_{\geq 0} \rightarrow \mathbb{R}_{\geq 0}$  with  $|\ell_M(\vec{x}, y, t)| \leq C_\ell + b(|t|)$  for all  $M \in \mathbb{N}$  and  $\vec{x} \in X^M$ ,  $y \in Y$ ,  $t \in \mathbb{R}$ ; 3) there exists  $L_\ell \in \mathbb{R}_{\geq 0}$  with

$$|\ell_M(\vec{x}_1, y_1, t_1) - \ell_M(\vec{x}_2, y_2, t_2)| \leq L_\ell (d_{\text{KR}}(\hat{\mu}[\vec{x}_1], \hat{\mu}[\vec{x}_2]) + |y_1 - y_2| + |t_1 - t_2|)$$

for all  $\vec{x}_1, \vec{x}_2 \in X^M$ ,  $y_1, y_2 \in Y$ ,  $t_1, t_2 \in \mathbb{R}$ . In particular, all  $\ell_M$  are measurable (assuming the Borel  $\sigma$ -algebra on  $X^M$ ) and hence are loss functions on  $X^M \times Y$ . Proposition 2.1 ensures the existence of a subsequence  $(\ell_{M_m})_m$  and an  $L_\ell$ -Lipschitz continuous function  $\ell : \mathcal{P}(X) \times Y \times \mathbb{R} \rightarrow \mathbb{R}$  with

$$\lim_{M \rightarrow \infty} \sup_{\substack{\vec{x} \in X^{M_m} \\ y \in Y, t \in K}} |\ell_{M_m}(\vec{x}, y, t) - \ell(\hat{\mu}[\vec{x}], y, t)| = 0 \quad (8)$$

for all compact  $K \subseteq \mathbb{R}$ , and we write again  $\ell_{M_m} \xrightarrow{\mathcal{P}_1} \ell$ . For readability, from now on we switch to this subsequence. Furthermore, we also get from Proposition 2.1 that there exists some  $C_L \in \mathbb{R}_{\geq 0}$  such that  $|\ell(\mu, y, t)| \leq C_L + b(|t|)$  for all  $\mu \in \mathcal{P}(X)$ ,  $y \in Y$ ,  $t \in \mathbb{R}$ .

**Remark 4.1.** Note that, for Proposition 2.1 to apply, it is enough to assume in item 2) above the existence of a function  $b : \mathbb{R} \rightarrow \mathbb{R}_{\geq 0}$  with  $|\ell_M(\vec{x}, y, t)| \leq C_\ell + b(|t|)$ . However, we chose the slightly stronger condition that  $b$  is nondecreasing, since then  $\ell_M$  is a *Nemitskii loss* according to [30, Definition 2.16]. Since the function with constant value  $C_\ell$  is actually  $P_M$ -integrable, this means that  $\ell_M$  is even a  $P_M$ -integrable *Nemitskii loss* according to [30]. A similar remark then applies to  $\ell$ .

**Lemma 4.2.** The function  $\ell$  is nonnegative. Furthermore, if all  $\ell_M$  are convex loss functions [30, Definition 2.12], i.e., if for all  $M \in \mathbb{N}_+$ ,  $\vec{x} \in X^M$ ,  $y \in Y$ ,  $t_1, t_2 \in \mathbb{R}$  and  $\lambda \in (0, 1)$  we have

$$\ell_M(\vec{x}, y, \lambda t_1 + (1 - \lambda)t_2) \leq \lambda \ell_M(\vec{x}, y, t_1) + (1 - \lambda) \ell_M(\vec{x}, y, t_2), \quad (9)$$

then so is  $\ell$ .

**Empirical SVM solutions** Given data sets  $D_N^{[M]} = ((\vec{x}_1^{[M]}, y_1^{[M]}), \dots, (\vec{x}_N^{[M]}, y_N^{[M]}))$  for all  $M \in \mathbb{N}_+$  with  $\vec{x}_n^{[M]} \in X^M$ ,  $y_n^{[M]} \in Y$ , and  $D_N = ((\mu_1, y_1), \dots, (\mu_N, y_N))$  with  $\mu_n \in \mathcal{P}(X)$  and  $y_n \in Y$ , we write  $D_N^{[M]} \xrightarrow{\mathcal{P}_1} D_N$  if  $\hat{\mu}[\vec{x}_n^{[M]}] \xrightarrow{d_{\text{KR}}} \mu_n$  and  $y_n^{[M]} \rightarrow y_n$  (where  $M \rightarrow \infty$ ) for all  $n = 1, \dots, N$ . We can interpret this as mean field convergence of the data sets.

Furthermore, consider the empirical risk of hypothesis  $f_M \in H_M$  (and  $f \in H_k$ ) on data set  $D_N^{[M]}$  (and  $D_N$ )

$$\mathcal{R}_{\ell_M, D_N^{[M]}}(f_M) = \frac{1}{N} \sum_{n=1}^N \ell_M(\vec{x}_n^{[M]}, y_n^{[M]}, f_M(\vec{x}_n^{[M]})), \quad \mathcal{R}_{\ell, D_N}(f) = \frac{1}{N} \sum_{n=1}^N \ell(\mu_n, y_n, f(\mu_n)),$$

289 and the corresponding regularized risk

$$\begin{aligned}\mathcal{R}_{\ell_M, D_N^{[M]}, \lambda}(f_M) &= \frac{1}{N} \sum_{n=1}^N \ell_M(\vec{x}_n^{[M]}, y_n^{[M]}, f_M(\vec{x}_n^{[M]})) + \lambda \|f_M\|_M^2 \\ \mathcal{R}_{\ell, D_N, \lambda}(f) &= \frac{1}{N} \sum_{n=1}^N \ell(\mu_n, y_n, f(\mu_n)) + \lambda \|f\|_k^2,\end{aligned}$$

290 where  $\lambda \in \mathbb{R}_{>0}$  is the regularization parameter.

291 **Proposition 4.3.** Let  $\lambda > 0$ , assume that all  $\ell_M$  are convex and let  $D_N^{[M]}$ ,  $D_N$  be finite data sets  
292 with  $D_N^{[M]} \xrightarrow{\mathcal{P}_1} D_N$ . Then for all  $M \in \mathbb{N}_+$ ,  $H_M \ni f_M \mapsto \mathcal{R}_{\ell_M, D_N^{[M]}, \lambda}(f_M)$  has a unique minimizer  
293  $f_{M, \lambda}^* \in H_M$  and  $H_k \ni f \mapsto \mathcal{R}_{\ell, D_N, \lambda}(f)$  has a unique minimizer  $f_\lambda^* \in H_k$ . Furthermore, for all  
294  $M \in \mathbb{N}_+$  there exist  $\alpha_n^{[M]} \in \mathbb{R}$ ,  $n = 1, \dots, N$ , such that  $f_{M, \lambda}^* = \sum_{n=1}^N \alpha_n^{[M]} k_M(\cdot, \vec{x}_n^{[M]})$ , and  
295 there exist  $\alpha_1, \dots, \alpha_N \in \mathbb{R}$  such that  $f_\lambda^* = \sum_{n=1}^N \alpha_n k(\cdot, \mu_n)$ . Finally, there exists a subsequence  
296  $(f_{M_m, \lambda}^*)_m$  such that  $f_{M_m, \lambda}^* \xrightarrow{\mathcal{P}_1} f_\lambda^*$  and  $\mathcal{R}_{\ell_{M_m}, D_N^{[M_m]}, \lambda}(f_{M_m, \lambda}^*) \rightarrow \mathcal{R}_{\ell, D_N, \lambda}(f_\lambda^*)$  for  $m \rightarrow \infty$ .

297 **Convergence of distributions and infinite-sample SVMs in the mean field limit** We now turn  
298 to the question of mean field limits of distributions and the associated learning problems and SVM  
299 solutions. Let  $(P^{[M]})_M$  be a sequence of distributions, where  $P^{[M]}$  is a probability distribution on  
300  $X^M \times Y$ , and let  $P$  be a probability distribution on  $\mathcal{P}(X) \times Y$ . We say that  $P^{[M]}$  converges in mean  
301 field to  $P$  and write  $P^{[M]} \xrightarrow{\mathcal{P}_1} P$ , if for all continuous (w.r.t. the product topology on  $\mathcal{P}(X) \times Y$ )  
302 and bounded <sup>4</sup>  $f$  we have

$$\int_{X^M \times Y} f(\hat{\mu}[\vec{x}], y) dP^{[M]}(\vec{x}, y) \rightarrow \int_{\mathcal{P}(X) \times Y} f(\mu, y) dP(\mu, y). \quad (10)$$

303 This convergence notion of probability distributions (on different input spaces) appears to be not  
304 standard, but it is a natural concept in the present context. Essentially, it is weak (also called narrow)  
305 convergence of probability distributions adapted to our setting.

306 Consider now data sets  $D_N^{[M]}$ ,  $D_N$ , with  $D_N^{[M]} \xrightarrow{\mathcal{P}_1} D_N$ , then we also have convergence in mean field  
307 of the datasets, interpreted as empirical distributions: let  $f \in C^0(\mathcal{P}(X) \times Y, \mathbb{R})$  be bounded, then

$$\begin{aligned}\int_{X^M \times Y} f(\hat{\mu}[\vec{x}], y) dD_N^{[M]}(\vec{x}, y) &= \frac{1}{N} \sum_{n=1}^N f(\hat{\mu}[\vec{x}_n^{[M]}], y_n^{[M]}) \\ &\xrightarrow{M \rightarrow \infty} \frac{1}{N} \sum_{n=1}^N f(\mu_n, y_n) = \int_{\mathcal{P}(X) \times Y} f(\mu, y) dD_N(\mu, y).\end{aligned}$$

308 This shows that the mean field convergence of probability distributions as defined here is a direct  
309 generalization of the natural notion of mean field convergence of data sets.

310 Finally, consider the risk of hypothesis  $f_M \in H_M$  and  $f \in H_k$  w.r.t. the distribution  $P^{[M]}$  and  $P$ ,  
311 respectively,

$$\begin{aligned}\mathcal{R}_{\ell_M, P^{[M]}}(f_M) &= \int_{X^M \times Y} \ell_M(\vec{x}, y, f_M(\vec{x})) dP^{[M]}(\vec{x}, y) \\ \mathcal{R}_{\ell, P}(f) &= \int_{\mathcal{P}(X) \times Y} \ell(\mu, y, f(\mu)) dP(\mu, y),\end{aligned}$$

312 as well as the minimal risks

$$\mathcal{R}_{\ell_M, P^{[M]}}^{H_M^*} = \inf_{f_M \in H_M} \mathcal{R}_{\ell_M, P^{[M]}}(f_M) \quad \mathcal{R}_{\ell, P}^{H_k^*} = \inf_{f \in H_k} \mathcal{R}_{\ell, P}(f).$$

313 Our first result ensures that mean field convergence of distributions  $P^{[M]}$ , loss functions  $\ell_M$  and data  
314 sets  $D_N^{[M]}$  ensures the convergence of the corresponding risks of the empirical SVM solutions.

---

<sup>4</sup>Of course, since  $Y$  is compact, all continuous  $f$  are bounded in our present setting.

315 **Lemma 4.4.** Consider the situation and notation of Proposition 4.3 and assume that  $P^{[M]} \xrightarrow{P_1} P$ .  
 316 We then have  $\mathcal{R}_{\ell_{M_m}, P^{[M_m]}}(f_{M_m, \lambda}^*) \rightarrow \mathcal{R}_{\ell, P}(f_\lambda^*)$  for  $m \rightarrow \infty$ .

317 Next, we investigate the mean field convergence of infinite-sample SVM solutions and their associated  
 318 risks. Define for  $\lambda \in \mathbb{R}_{\geq 0}$  (and all  $M \in \mathbb{N}_+$ ) the regularized risk of  $f_M \in H_M$  and  $f \in H_k$ ,  
 319 respectively, by

$$\mathcal{R}_{\ell_M, P^{[M]}, \lambda}(f_M) = \mathcal{R}_{\ell_M, P^{[M]}}(f_M) + \lambda \|f_M\|_M^2, \quad \mathcal{R}_{\ell, P, \lambda}(f) = \mathcal{R}_{\ell, P}(f) + \lambda \|f\|_k^2,$$

320 and the corresponding minimal risks by

$$\mathcal{R}_{\ell_M, P^{[M]}, \lambda}^{H_M^*} = \inf_{f_M \in H_M} \mathcal{R}_{\ell_M, P^{[M]}, \lambda}(f_M), \quad \mathcal{R}_{\ell, P, \lambda}^{H_k^*} = \inf_{f \in H_k} \mathcal{R}_{\ell, P, \lambda}(f).$$

321 **Proposition 4.5.** <sup>5</sup> Let  $\lambda > 0$ , assume that all  $\ell_M$  are convex loss functions and let  $P^{[M]}$  and  $P$   
 322 be probability distributions on  $X^M \times Y$  and  $\mathcal{P}(X) \times Y$ , respectively, with  $P^{[M]} \xrightarrow{P_1} P$ . Then  
 323 for all  $M \in \mathbb{N}_+$ ,  $H_M \ni f_M \mapsto \mathcal{R}_{\ell_M, P^{[M]}, \lambda}(f_M)$  has a unique minimizer  $f_{M, \lambda}^* \in H_M$  and  
 324  $H_k \ni f \mapsto \mathcal{R}_{\ell, P, \lambda}(f)$  has a unique minimizer  $f_\lambda^* \in H_k$ . Furthermore, there exists a subsequence  
 325  $(f_{M_m, \lambda}^*)_m$  such that  $f_{M_m, \lambda}^* \xrightarrow{P_1} f_\lambda^*$  and  $\mathcal{R}_{\ell_{M_m}, P^{[M_m]}, \lambda}(f_{M_m, \lambda}^*) \rightarrow \mathcal{R}_{\ell, P, \lambda}(f_\lambda^*)$  for  $m \rightarrow \infty$ . In  
 326 particular,  $\mathcal{R}_{\ell_{M_m}, P^{[M_m]}, \lambda}^{H_{M_m}^*} \rightarrow \mathcal{R}_{\ell, P, \lambda}^{H_k^*}$ .

327 Finally, we would like to show that  $\mathcal{R}_{\ell_M, P^{[M]}, \lambda}^{H_M^*} \rightarrow \mathcal{R}_{\ell, P, \lambda}^{H_k^*}$  for  $P^{[M]} \xrightarrow{P_1} P$ . Up to a subsequence, this is  
 328 established under Assumption 4.6. Define the *approximation error functions*, cf. [30, Definition 5.14],  
 329 by

$$A_2^{[M]}(\lambda) = \inf_{f \in H_M} \mathcal{R}_{\ell_M, P^{[M]}, \lambda}(f) - \mathcal{R}_{\ell_M, P^{[M]}}^{H_M^*}, \quad A_2(\lambda) = \inf_{f \in H_k} \mathcal{R}_{\ell, P, \lambda}(f) - \mathcal{R}_{\ell, P}^{H_k^*},$$

330 where  $M \in \mathbb{N}_+$  and  $\lambda \in \mathbb{R}_{\geq 0}$ . Note that (for all  $M \in \mathbb{N}_+$ )  $A_2^{[M]}, A_2 : \mathbb{R}_{\geq 0} \rightarrow \mathbb{R}_{\geq 0}$  are increas-  
 331 ing, concave and continuous, and  $A_2^{[M]}, A_2(0) = 0$ , cf. [30, Lemma 5.15]. We need essentially  
 332 equicontinuity of  $(A_2^{[M]})_M$  in 0, which is formalized in the following assumption.

333 **Assumption 4.6.** For all  $\epsilon > 0$  there exists  $\lambda_\epsilon > 0$  such that for all  $0 < \lambda \leq \lambda_\epsilon$  and  $M \in \mathbb{N}_+$  we  
 334 have  $A_2^{[M]}(\lambda) \leq \epsilon$ .

335 **Proposition 4.7.** Assume that all  $\ell_M$  are convex loss functions, let  $P^{[M]}$  and  $P$  be probability  
 336 distributions on  $X^M \times Y$  and  $\mathcal{P}(X) \times Y$ , respectively, with  $P^{[M]} \xrightarrow{P_1} P$ . If Assumption 4.6 holds,  
 337 there exists a strictly increasing sequence  $(M_m)_m$  with  $\mathcal{R}_{\ell_{M_m}, P^{[M_m]}}^{H_{M_m}^*} \rightarrow \mathcal{R}_{\ell, P}^{H_k^*}$  for  $m \rightarrow \infty$ .

## 338 5 Conclusion

339 We investigated the mean field limit of kernels and their RKHSs, as well as the mean field limit of  
 340 statistical learning problems solved with SVMs. In particular, we managed to complete the basic  
 341 theory of mean field kernels as started in [18]. Additionally, we investigated their approximation  
 342 capabilities by providing a first approximation result and a variant of the representer theorem for  
 343 mean field kernels. Finally, we introduced a corresponding mean field limit of statistical learning  
 344 problems and provided convergence results for SVMs using mean field kernels. In contrast to other  
 345 settings involving a large number of variables, for example, infinite-width neural networks, here we  
 346 considered the case of an increasing number of inputs. This work opens many directions for future  
 347 investigation. For example, it would be interesting to remove or weaken Assumption 4.6 for a result  
 348 like Proposition 4.7. Another relevant direction is to find approximation results that are stronger than  
 349 Proposition 3.1. Finally, it would be interesting to investigate whether statistical guarantees, like  
 350 consistency or learning rates, for the finite-input learning problems can be transferred to the mean  
 351 field level.

---

<sup>5</sup>Note that Proposition 4.3 is actually a corollary of this result. However, since the former result is independent of the notion of mean field convergence of probability distributions, we stated and proved it separately.

## References

- [1] Giacomo Albi, Mattia Bongini, Emiliano Cristiani, and Dante Kalise. Invisible control of self-organizing agents leaving unknown environments. *SIAM Journal on Applied Mathematics*, 76(4):1683–1710, 2016.
- [2] Sanjeev Arora, Simon S Du, Wei Hu, Zhiyuan Li, Russ R Salakhutdinov, and Ruosong Wang. On exact computation with an infinitely wide neural net. *Advances in neural information processing systems*, 32, 2019.
- [3] Marc Attéia. *Hilbertian kernels and spline functions*. Elsevier, 1992.
- [4] Michele Ballerini, Nicola Cabibbo, Raphael Candelier, Andrea Cavagna, Evaristo Cisbani, Irene Giardina, Vivien Lecomte, Alberto Orlandi, Giorgio Parisi, Andrea Procaccini, et al. Interaction ruling animal collective behavior depends on topological rather than metric distance: Evidence from a field study. *Proceedings of the national academy of sciences*, 105(4):1232–1237, 2008.
- [5] Mattia Bongini. *Sparse optimal control of multiagent systems*. PhD thesis, Technische Universität München, 2016.
- [6] Mattia Bongini, Massimo Fornasier, Markus Hansen, and Mauro Maggioni. Inferring interaction rules from observations of evolutive systems i: The variational approach. *Mathematical Models and Methods in Applied Sciences*, 27(05):909–951, 2017.
- [7] Pierre Cardaliaguet. Notes on mean field games. Technical report, Technical report, 2010.
- [8] René Carmona, François Delarue, et al. *Probabilistic theory of mean field games with applications I-II*. Springer, 2018.
- [9] José A Carrillo, Massimo Fornasier, Giuseppe Toscani, and Francesco Vecil. Particle, kinetic, and hydrodynamic models of swarming. *Mathematical modeling of collective behavior in socio-economic and life sciences*, pages 297–336, 2010.
- [10] Claudio Castellano, Santo Fortunato, and Vittorio Loreto. Statistical physics of social dynamics. *Reviews of modern physics*, 81(2):591, 2009.
- [11] Carlo Cercignani. *Rarefied gas dynamics: from basic concepts to actual calculations*, volume 21. Cambridge university press, 2000.
- [12] Carlo Cercignani, Reinhard Illner, and Mario Pulvirenti. *The mathematical theory of dilute gases*, volume 106. Springer Science & Business Media, 1994.
- [13] Young-Pil Choi, Dante Kalise, Jan Peszek, and Andrés A Peters. A collisionless singular Cucker–Smale model with decentralized formation control. *SIAM Journal on Applied Dynamical Systems*, 18(4):1954–1981, 2019.
- [14] Andreas Christmann and Ingo Steinwart. Universal kernels on non-standard input spaces. *Advances in neural information processing systems*, 23, 2010.
- [15] Emiliano Cristiani, Benedetto Piccoli, and Andrea Tosin. *Multiscale modeling of pedestrian dynamics*, volume 12. Springer, 2014.
- [16] Gianni Dal Maso. *An introduction to  $\Gamma$ -convergence*, volume 8. Springer Science & Business Media, 2012.
- [17] John RG Dyer, Anders Johansson, Dirk Helbing, Iain D Couzin, and Jens Krause. Leadership, consensus decision making and collective behaviour in humans. *Philosophical Transactions of the Royal Society B: Biological Sciences*, 364(1518):781–789, 2009.
- [18] Christian Fiedler, Michael Herty, Michael Rom, Chiara Segala, and Sebastian Trimpe. Reproducing kernel hilbert spaces in the mean field limit. *Submitted to Kinetic and Related Models*, 2022 (under review).
- [19] Massimo Fornasier, Stefano Lisini, Carlo Orrieri, and Giuseppe Savaré. Mean-field optimal control as gamma-limit of finite agent controls. *European Journal of Applied Mathematics*, 30(6):1153–1186, 2019.
- [20] Massimo Fornasier and Francesco Solombrino. Mean-field optimal control. *ESAIM: Control, Optimisation and Calculus of Variations*, 20(4):1123–1152, 2014.
- [21] Xiaoqian Gong, Michael Herty, Benedetto Piccoli, and Giuseppe Visconti. Crowd dynamics: Modeling and control of multiagent systems. *Annual Review of Control, Robotics, and Autonomous Systems*, 6, 2022.

- 399 [22] Michael Herty and Mattia Zanella. Performance bounds for the mean-field limit of constrained dynamics.  
400 *Discrete & Continuous Dynamical Systems*, 37(4):2023, 2017.
- 401 [23] Yael Katz, Kolbjørn Tunstrøm, Christos C Ioannou, Cristián Huepe, and Iain D Couzin. Inferring the  
402 structure and dynamics of interactions in schooling fish. *Proceedings of the National Academy of Sciences*,  
403 108(46):18720–18725, 2011.
- 404 [24] Serge Lang. *Real and functional analysis*, volume 142. Springer Science & Business Media, 2012.
- 405 [25] Fei Lu, Ming Zhong, Sui Tang, and Mauro Maggioni. Nonparametric inference of interaction laws in  
406 systems of agents from trajectory data. *Proceedings of the National Academy of Sciences*, 116(29):14424–  
407 14433, 2019.
- 408 [26] Giovanni Naldi, Lorenzo Pareschi, and Giuseppe Toscani. *Mathematical modeling of collective behavior*  
409 *in socio-economic and life sciences*. Springer Science & Business Media, 2010.
- 410 [27] Kwang-Kyo Oh, Myoung-Chul Park, and Hyo-Sung Ahn. A survey of multi-agent formation control.  
411 *Automatica*, 53:424–440, 2015.
- 412 [28] Andrés A Peters, Richard H Middleton, and Oliver Mason. Leader tracking in homogeneous vehicle  
413 platoons with broadcast delays. *Automatica*, 50(1):64–74, 2014.
- 414 [29] Bernhard Schölkopf, Ralf Herbrich, and Alex J Smola. A generalized representer theorem. In *International*  
415 *conference on computational learning theory*, pages 416–426. Springer, 2001.
- 416 [30] Ingo Steinwart and Andreas Christmann. *Support vector machines*. Springer Science & Business Media,  
417 2008.
- 418 [31] Giuseppe Toscani. Kinetic models of opinion formation. *Communications in mathematical sciences*,  
419 4(3):481–496, 2006.
- 420 [32] Andrea Tosin and Mattia Zanella. Kinetic-controlled hydrodynamics for traffic models with driver-assist  
421 vehicles. *Multiscale Modeling & Simulation*, 17(2):716–749, 2019.
- 422 [33] Tamás Vicsek and Anna Zafeiris. Collective motion. *Physics reports*, 517(3-4):71–140, 2012.

## Supplementary Material

### A Proofs

In this section of the supplementary material, we provide detailed proofs for all results in the main text.

#### A.1 Proofs for Section 2

We start with Proposition 2.1, whose proof is based on [8, Lemma 1.2].

*Proof. of Proposition 2.1* For  $M \in \mathbb{N}_+$  define the McShane extension  $F_M : \mathcal{P}(X) \times Z \rightarrow \mathbb{R}$  by

$$F_M(\mu, z) = \inf_{\vec{x} \in X^M} f_M(\vec{x}, z) + L_f d_{\text{KR}}(\hat{\mu}[\vec{x}], \mu).$$

Observe that  $F_M$  is well-defined (i.e.,  $\mathbb{R}$ -valued) since  $f_M(\cdot, z)$  and  $L_f d_{\text{KR}}(\hat{\mu}[\cdot], \mu)$  are bounded for every  $z \in Z$  (since  $f_M$  and  $d_{\text{KR}}(\hat{\mu}[\cdot], \mu)$  are continuous and  $\mathcal{P}(X)$  is compact, hence bounded).

**Step 1**  $F_M$  extends  $f_M$ , i.e., for all  $M \in \mathbb{N}_+$ ,  $\vec{x} \in X^M$  and  $z \in Z$  we have  $F_M(\hat{\mu}[\vec{x}], z) = f_M(\vec{x}, z)$ . To show this, let  $\vec{x} \in X^M$  and  $z \in Z$  be arbitrary and observe that by definition

$$F_M(\hat{\mu}[\vec{x}], z) = \inf_{\vec{x}' \in X^M} f_M(\vec{x}', z) + L_f d_{\text{KR}}(\hat{\mu}[\vec{x}'], \hat{\mu}[\vec{x}]) \leq f_M(\vec{x}, z) + L_f d_{\text{KR}}(\hat{\mu}[\vec{x}], \hat{\mu}[\vec{x}]) = f_M(\vec{x}, z).$$

If  $F_M(\hat{\mu}[\vec{x}], z) < f_M(\vec{x}, z)$ , then there exists some  $\vec{x}' \in X^M$  such that

$$f_M(\vec{x}', z) + L_f d_{\text{KR}}(\hat{\mu}[\vec{x}'], \hat{\mu}[\vec{x}]) < f_M(\vec{x}, z),$$

but this means that

$$L_f d_{\text{KR}}(\hat{\mu}[\vec{x}'], \hat{\mu}[\vec{x}]) < f_M(\vec{x}, z) - f_M(\vec{x}', z) \leq |f_M(\vec{x}, z) - f_M(\vec{x}', z)|,$$

contradicting the  $L_f$ -Lipschitz continuity of  $f_M$ .

**Step 2** All  $F_M$  are  $L_f$ -continuous: Let  $M \in \mathbb{N}_+$ ,  $\mu_i \in \mathcal{P}(X)$  and  $z_i \in Z$ ,  $i = 1, 2$ , be arbitrary. Since  $X^M$  is compact and  $f_M(\cdot, z)$  and  $L_f d_{\text{KR}}(\hat{\mu}[\cdot], \mu_i)$ ,  $i = 1, 2$ , are continuous, the infimum in the definition of  $F_M$  is actually attained. Let  $\vec{x}_2 \in X^M$  such that  $F_M(\mu_2, z_2) = f_M(\vec{x}_2, z_2) + L_f d_{\text{KR}}(\hat{\mu}[\vec{x}_2], \mu_2)$ , then we have

$$\begin{aligned} F_M(\mu_1, z_1) &\leq f_M(\vec{x}_2, z_1) + L_f d_{\text{KR}}(\hat{\mu}[\vec{x}_2], \mu_1) \\ &= f_M(\vec{x}_2, z_1) + L_f d_{\text{KR}}(\hat{\mu}[\vec{x}_2], \mu_2) - L_f d_{\text{KR}}(\hat{\mu}[\vec{x}_2], \mu_2) + L_f d_{\text{KR}}(\hat{\mu}[\vec{x}_2], \mu_1) \\ &\leq f_M(\vec{x}_2, z_2) + L_f d_{\text{KR}}(\hat{\mu}[\vec{x}_2], \mu_2) + L_f d_Z(z_1, z_2) - L_f d_{\text{KR}}(\hat{\mu}[\vec{x}_2], \mu_2) \\ &\quad + L_f d_{\text{KR}}(\hat{\mu}[\vec{x}_2], \mu_1) \\ &\leq F_M(\mu_2, z_2) + L_f d_Z(z_1, z_2) - L_f d_{\text{KR}}(\hat{\mu}[\vec{x}_2], \mu_2) + L_f d_{\text{KR}}(\mu_1, \mu_2) \\ &\quad + L_f d_{\text{KR}}(\hat{\mu}[\vec{x}_2], \mu_2) \\ &= F_M(\mu_2, z_2) + L_f (d_{\text{KR}}(\mu_1, \mu_2) + d_Z(z_1, z_2)), \end{aligned}$$

where we used the definition of  $F_M$  in the first inequality, the Lipschitz continuity of  $f_M$  (w.r.t. the second argument) for the second inequality, and then the fact that  $\vec{x}_2$  attains the infimum in the definition of  $F_M(\mu_2, z_2)$  and the triangle inequality for  $d_{\text{KR}}$ . Interchanging the roles of  $\mu_1, z_1$  and  $\mu_2, z_2$  then establishes the claim.

**Step 3** There exists  $B_F \in \mathbb{R}_{\geq 0}$  such that for all  $M \in \mathbb{N}_+$ ,  $\mu \in \mathcal{P}(X)$  and  $z \in Z$  we have  $|F_M(\mu, z)| \leq B_F + h(z)$ : Let  $D_{\mathcal{P}(X)}$  be the diameter of  $\mathcal{P}(X)$  (which is finite since  $\mathcal{P}(X)$  is compact), then for all  $M \in \mathbb{N}_+$  and  $\vec{x} \in X^M$ ,  $z \in Z$ ,  $\mu \in \mathcal{P}(X)$  we have

$$-(B_f + L_f D_{\mathcal{P}(X)} + b(z)) \leq f_M(\vec{x}, z) + L_f d_{\text{KR}}(\hat{\mu}[\vec{x}], \mu) \leq B_f + L_f D_{\mathcal{P}(X)} + b(z),$$

therefore  $|F_M(\mu, z)| \leq B_f + L_f D_{\mathcal{P}(X)} + b(z)$ , showing the claim with  $B_F = B_f + L_f D_{\mathcal{P}(X)}$ .

**Step 4** Summarizing,  $(F_M)_M$  is a sequence of  $L_f$ -Lipschitz continuous and hence equicontinuous functions such that for all  $\mu \in \mathcal{P}(X)$  and  $z \in Z$ , the set  $\{F_M(\mu, z) \mid M \in \mathbb{N}_+\}$  is relatively compact (since it is a bounded subset of  $\mathbb{R}$ ). We can now use a variant of the Arzela-Ascoli theorem, cf. [24,

Corollary III.3.3]. From the assumption on  $Z$ , we can find a sequence  $(V_n)_n$  of open subsets of  $Z$  such that all  $\bar{V}_n$  are compact,  $\bar{V}_n \subseteq V_{n+1}$  and we have  $\bigcup_n V_n = Z$ . Then  $(F_M|_{\bar{V}_n})_M$  is a sequence of functions that fulfills the conditions of the Arzela-Ascoli theorem (since  $\mathcal{P}(X) \times K_n$  is compact), so there exists a subsequence  $(F_{M_\ell^{(n)}}|_{\bar{V}_n})_\ell$  that converges uniformly to a continuous function on  $\mathcal{P}(X) \times \bar{V}_n$ . Denote the diagonal subsequence of all these subsequences by  $(F_{M_\ell})_\ell$ , then there exists a continuous  $f : \mathcal{P}(X) \times Z \rightarrow \mathbb{R}$  such that  $(F_{M_\ell})_\ell$  converges uniformly on compact subsets to  $f$ . Since  $\mathcal{P}(X)$  is compact, this means that for all compact  $K \subseteq Z$

$$\lim_\ell \sup_{\substack{\mu \in \mathcal{P}(X) \\ z \in K}} |F_{M_\ell}(\mu, z) - f(\mu, z)| = 0.$$

This also implies that for all  $\mu \in \mathcal{P}(X)$  and  $z \in Z$  we have  $|f(\mu, z)| \leq B_F + b(z)$ .

Furthermore,  $f$  is also  $L_f$ -Lipschitz continuous: Let  $\mu_i \in \mathcal{P}(X)$ ,  $z_i \in Z$ ,  $i = 1, 2$ , and  $\epsilon > 0$  be arbitrary. Let  $K \subseteq Z$  be compact with  $z_1, z_2 \in K$  and choose  $\ell \in \mathbb{N}_+$  such that

$$\sup_{\substack{\mu \in \mathcal{P}(X) \\ z \in K}} |F_{M_\ell}(\mu, z) - f(\mu, z)| \leq \frac{\epsilon}{2}.$$

We then have

$$\begin{aligned} |f(\mu_1, z_1) - f(\mu_2, z_2)| &\leq |f(\mu_1, z_1) - F_{M_\ell}(\mu_1, z_1)| + |F_{M_\ell}(\mu_1, z_1) - F_{M_\ell}(\mu_2, z_2)| \\ &\quad + |F_{M_\ell}(\mu_2, z_2) - f(\mu_2, z_2)| \\ &\leq L_f (d_{\text{KR}}(\mu_1, \mu_2) + d_Z(z_1, z_2)) + \epsilon, \end{aligned}$$

and since  $\epsilon > 0$  was arbitrary, the claim follows.

**Step 5** For  $\ell \in \mathbb{N}_+$  and  $\vec{x} \in X^{M_\ell}$ ,  $z \in Z$  we have

$$|f_{M_\ell}(\vec{x}, z) - f(\hat{\mu}[\vec{x}], z)| = |F_{M_\ell}(\hat{\mu}[\vec{x}], z) - f(\hat{\mu}[\vec{x}], z)|$$

since  $F_{M_\ell}$  extends  $f_{M_\ell}$ , and hence

$$\sup_{\substack{\vec{x} \in X^{M_\ell} \\ z \in K}} |f_{M_\ell}(\vec{x}, z) - f(\hat{\mu}[\vec{x}], z)| \rightarrow 0.$$

□

Next, we provide the proofs for the  $\Gamma$ -lim inf and  $\Gamma$ -lim sup results.

*Proof. of Lemma 2.4* Assume the statement is not true, i.e.,  $\|f\|_k > \liminf_{M \rightarrow \infty} \|f_M\|_M$ . This means that there exists a subsequence  $M_\ell$  and  $C \in \mathbb{R}_{\geq 0}$  such that  $\|f\|_k > \lim_\ell \|f_{M_\ell}\|_{M_\ell} = C$ . Note that this implies that  $\|f\|_k > 0$ .

Let  $\epsilon_1, \epsilon_2 > 0$  and  $\alpha > 1$ ,  $\beta \in (0, 1)$  be arbitrary. From Theorem B.1, there exists  $(\vec{\mu}, \vec{\alpha}) \in \mathcal{P}(X)^N \times \mathbb{R}^N$  such that

$$\mathcal{D}(\vec{\mu}, \vec{\alpha}, f, k) + \epsilon_1 \geq \|f\|_k,$$

and w.l.o.g. we can assume that  $\epsilon_1 > 0$  is small enough so that  $\mathcal{D}(\vec{\mu}, \vec{\alpha}, f, k) > 0$ . The latter implies that  $\mathcal{E}(\vec{\mu}, \vec{\alpha}, f)$ ,  $\mathcal{W}(\vec{\mu}, \vec{\alpha}, k) > 0$ , so defining

$$\begin{aligned} \epsilon_\alpha &= \frac{\alpha - 1}{\alpha} \mathcal{E}(\vec{\mu}, \vec{\alpha}, f) \\ \epsilon_\beta &= (1/\beta - 1) \mathcal{W}(\vec{\mu}, \vec{\alpha}, k) \end{aligned}$$

we get  $\epsilon_\alpha, \epsilon_\beta > 0$ . For each  $n = 1, \dots, N$ , choose  $\vec{x}_n^{[M]} \in X^M$  such that  $\vec{x}_n^{[M]} \xrightarrow{d_{\text{KR}}} \mu_n$  for  $M \rightarrow \infty$ . Choose now  $L_1 \in \mathbb{N}$  such that for all  $\ell \geq L_1$  we get

$$\begin{aligned} |\mathcal{E}(\vec{X}^{[M_\ell]}, \vec{\alpha}, f_{M_\ell}) - \mathcal{E}(\vec{\mu}, \vec{\alpha}, f)| &\leq \epsilon_\alpha \\ |\mathcal{W}(\vec{X}^{[M_\ell]}, \vec{\alpha}, k_{M_\ell}) - \mathcal{W}(\vec{\mu}, \vec{\alpha}, k)| &\leq \epsilon_\beta. \end{aligned}$$

(cf. also the proof of Theorem 2.3) and  $\mathcal{W}(\vec{X}^{[M_\ell]}, \vec{\alpha}, k^{[M_\ell]}) > 0$ . We then get

$$\begin{aligned} \mathcal{E}(\vec{\mu}, \vec{\alpha}, f) &\leq \alpha \mathcal{E}(\vec{X}^{[M_\ell]}, \vec{\alpha}, f_{M_\ell}) \\ \mathcal{W}(\vec{\mu}, \vec{\alpha}, k) &\geq \beta \mathcal{W}(\vec{X}^{[M_\ell]}, \vec{\alpha}, k^{[M_\ell]}), \end{aligned}$$

478 so altogether

$$\frac{\mathcal{E}(\vec{\mu}, \vec{\alpha}, f)}{\mathcal{W}(\vec{\mu}, \vec{\alpha}, k)} \leq \frac{\alpha \mathcal{E}(\vec{X}^{[M_\ell]}, \vec{\alpha}, f_{M_\ell})}{\beta \mathcal{W}(\vec{X}^{[M_\ell]}, \vec{\alpha}, k^{[M_\ell]})}.$$

479 Using Theorem B.1 again leads to

$$\frac{\alpha \mathcal{E}(\vec{X}^{[M_\ell]}, \vec{\alpha}, f_{M_\ell})}{\beta \mathcal{W}(\vec{X}^{[M_\ell]}, \vec{\alpha}, k^{[M_\ell]})} = \mathcal{D}(\vec{X}^{[M_\ell]}, \vec{\alpha}, f_{M_\ell}, k^{[M_\ell]}) \leq \|f_{M_\ell}\|_{M_\ell}.$$

480 Finally, let  $L_2$  such that for all  $\ell \geq L_2$  we have  $\|f_{M_\ell}\|_{M_\ell} \leq C + \epsilon_2$ . For  $\ell \geq L_1, L_2$  we then get

$$\begin{aligned} C &< \|f\|_k \leq \mathcal{D}(\vec{\mu}, \vec{\alpha}, f, k) + \epsilon_1 \\ &= \frac{\mathcal{E}(\vec{\mu}, \vec{\alpha}, f)}{\mathcal{W}(\vec{\mu}, \vec{\alpha}, k)} + \epsilon_1 \\ &\leq \frac{\alpha \mathcal{E}(\vec{X}^{[M_\ell]}, \vec{\alpha}, f_{M_\ell})}{\beta \mathcal{W}(\vec{X}^{[M_\ell]}, \vec{\alpha}, k^{[M_\ell]})} + \epsilon_1 \\ &\leq \frac{\alpha}{\beta} \|f_{M_\ell}\|_{M_\ell} + \epsilon_1 \\ &\leq \frac{\alpha}{\beta} C + \frac{\alpha}{\beta} \epsilon_2 + \epsilon_1. \end{aligned}$$

481 Since  $\epsilon_1, \epsilon_2 > 0$  and  $\alpha > 1, \beta \in (0, 1)$  were arbitrary, this implies that

$$C < \|f\|_k \leq C,$$

482 a contradiction. □

483 *Proof. of Lemma 2.5* Let  $f \in H_k$  be arbitrary and choose  $(\epsilon_n)_n \subseteq \mathbb{R}_{>0}$  with  $\epsilon_n \searrow 0$ .

484 **Step 1** For each  $n \in \mathbb{N}$  choose

$$f_n^{\text{pre}} = \sum_{\ell=1}^{L_n} \alpha_\ell^{(n)} k(\cdot, \mu_\ell^{(n)}) \in H_k^{\text{pre}},$$

485 where  $\alpha_1^{(n)}, \dots, \alpha_{L_n}^{(n)} \in \mathbb{R}$  and  $\mu_1^{(n)}, \dots, \mu_{L_n}^{(n)} \in \mathcal{P}(X)$ , with

$$\|f - f_n^{\text{pre}}\|_k \leq \frac{\epsilon_n}{3\sqrt{C_k}}$$

486 and  $\|f_n^{\text{pre}}\|_k \leq \|f\|_k$ . To see that such a sequence of functions exists, choose some sequence

487  $(\bar{f}_n)_n \in H_k^{\text{pre}}$  with  $\bar{f}_n = \sum_{\ell=1}^{L_n} \bar{\alpha}_\ell^{(n)} k(\cdot, \bar{\mu}_\ell^{(n)})$ , where  $\bar{\alpha}_\ell^{(n)} \in \mathbb{R}, \bar{\mu}_\ell^{(n)} \in \mathcal{P}(X)$ , with  $\bar{f}_n \xrightarrow{\|\cdot\|_k} f$   
488 (exists since  $H_k^{\text{pre}}$  is dense in  $H_k$ ). Define now for  $n \in \mathbb{N}$

$$\bar{H}_n = \text{span}\{k(\cdot, \bar{\mu}_\ell^{(m)}) \mid m = 1, \dots, n, \ell = 1, \dots, \bar{L}_m\}$$

489 and  $\hat{f}_n = P_{\bar{H}_n} f$ , where  $P_{\bar{H}_n}$  is the orthogonal projection onto  $\bar{H}_n$ . Then  $\bar{H}_n \subseteq H_k^{\text{pre}}$ ,  $\|\hat{f}_n\|_k =$   
490  $\|P_{\bar{H}_n} f\|_k \leq \|f\|_k$  and  $\|f - \hat{f}_n\|_k \leq \|f - \bar{f}_n\|_k \rightarrow 0$  (since  $\hat{f}_n = P_{\bar{H}_n} f$  is the orthogonal projection  
491 of  $f$  onto  $\bar{H}_n$  and  $\bar{f}_n \in \bar{H}_n$ ), hence  $\hat{f}_n \xrightarrow{\|\cdot\|_k} f$ . We can now choose  $(f_n^{\text{pre}})_n$  as a subsequence of  
492  $(\hat{f}_n)_n$ .

493 Next, for all  $n \in \mathbb{N}$  and  $\ell = 1, \dots, L_n$  choose  $\vec{x}_M^{(n, \ell)} \in X^M$  with  $\hat{\mu}[\vec{x}_M^{(n, \ell)}] \xrightarrow{d_{\text{KR}}} \mu_\ell^{(n)}$  for  $M \rightarrow \infty$ .

494 Furthermore, for all  $n \in \mathbb{N}$  choose  $M_n \in \mathbb{N}$  such that for all  $M \geq M_n$  and  $\ell = 1, \dots, L_n$  we have

$$d_{\text{KR}}(\hat{\mu}[\vec{x}_M^{(n, \ell)}], \mu_\ell^{(n)}) \leq \min \left\{ \frac{\epsilon_n}{3 \left(1 + L_k \sum_{\ell'=1}^{L_n} |\alpha_{\ell'}^{(n)}|\right)}, \frac{\epsilon_n^2}{2 \left(1 + 2L_k \sum_{i,j=1}^{L_n} |\alpha_i^{(n)}| |\alpha_j^{(n)}|\right)} \right\}$$

495 and

$$\sup_{\vec{x}, \vec{x}' \in X^M} |k_M(\vec{x}, \vec{x}') - k(\hat{\mu}[\vec{x}], \hat{\mu}[\vec{x}'])| \leq \min \left\{ \frac{\epsilon_n}{3 \left(1 + \sum_{\ell'=1}^{L_n} |\alpha_{\ell'}^{(n)}|\right)}, \frac{\epsilon_n^2}{2 \left(1 + \sum_{i,j=1}^{L_n} |\alpha_i^{(n)}| |\alpha_j^{(n)}|\right)} \right\}.$$

496 W.l.o.g. we can assume that  $(M_n)_n$  is strictly increasing. For  $M \in \mathbb{N}$ , let  $n(M)$  be the largest integer  
 497 such that  $M_{n(M)} \leq M$  and define

$$\begin{aligned}\hat{f}_M^{\text{pre}} &= \sum_{\ell=1}^{L_{n(M)}} \alpha_\ell^{(n(M))} k(\cdot, \hat{\mu}[\vec{x}_M^{(n(M), \ell)}]) \in H_k^{\text{pre}} \\ f_M &= \sum_{\ell=1}^{L_{n(M)}} \alpha_\ell^{(n(M))} k_M(\cdot, \vec{x}_M^{(n(M), \ell)}) \in H_M^{\text{pre}}.\end{aligned}$$

498 **Step 2** We now show that  $f_M \xrightarrow{\mathcal{P}_1} f$ . For this, let  $\epsilon > 0$  be arbitrary and  $n_\epsilon \in \mathbb{N}$  such that  $\epsilon_n \leq \epsilon$ .  
 499 Let now  $M \geq M_{n_\epsilon}$  (note that this implies that  $n(M) \geq n_\epsilon$  and hence  $\epsilon_{n(M)} \leq \epsilon_n$ ) and  $\vec{x} \in X^M$ ,  
 500 then we have

$$|f(\hat{\mu}[\vec{x}]) - f_M(\vec{x})| \leq \underbrace{|f(\hat{\mu}[\vec{x}]) - f_{n(M)}(\hat{\mu}[\vec{x}])|}_{=I} + \underbrace{|f_{n(M)}(\hat{\mu}[\vec{x}]) - \hat{f}_M^{\text{pre}}(\hat{\mu}[\vec{x}])|}_{=II} + \underbrace{|\hat{f}_M^{\text{pre}}(\hat{\mu}[\vec{x}]) - f_M(\vec{x})|}_{=III}$$

501 We continue with

$$\begin{aligned}I &= |f(\hat{\mu}[\vec{x}]) - f_{n(M)}(\hat{\mu}[\vec{x}])| \\ &= |\langle f - f_{n(M)}, k(\cdot, \hat{\mu}[\vec{x}]) \rangle_k| \\ &\leq \|f - f_{n(M)}\|_k \|k(\cdot, \hat{\mu}[\vec{x}])\|_k \\ &= \|f - f_{n(M)}\|_k \sqrt{k(\hat{\mu}[\vec{x}], \hat{\mu}[\vec{x}])} \\ &\leq \frac{\epsilon_{n(M)}}{3\sqrt{C_k}} \sqrt{C_k}\end{aligned}$$

502 where we first used the reproducing property of  $k$ , then Cauchy-Schwarz, again the reproducing  
 503 property of  $k$ , and finally the choice  $f_{n(M)}$  and the boundedness of  $k$ .

504 Next,

$$\begin{aligned}II &= |f_{n(M)}(\hat{\mu}[\vec{x}]) - \hat{f}_M^{\text{pre}}(\hat{\mu}[\vec{x}])| \\ &= \left| \sum_{\ell=1}^{L_{n(M)}} \alpha_\ell^{(n(M))} k(\cdot, \mu_\ell^{(n(M))}) - \sum_{\ell=1}^{L_{n(M)}} \alpha_\ell^{(n(M))} k(\cdot, \hat{\mu}[\vec{x}_M^{(n(M), \ell)}]) \right| \\ &\leq \sum_{\ell=1}^{L_{n(M)}} \left| \alpha_\ell^{(n(M))} \right| |k(\cdot, \mu_\ell^{(n(M))}) - k(\cdot, \hat{\mu}[\vec{x}_M^{(n(M), \ell)}])| \\ &\leq L_k \sum_{\ell=1}^{L_{n(M)}} \left| \alpha_\ell^{(n(M))} \right| d_{\text{KR}}(\hat{\mu}[\vec{x}_M^{(n(M), \ell)}], \mu_\ell^{(n(M))}) \\ &\leq \frac{\epsilon_{n(M)}}{3},\end{aligned}$$

505 where we used the triangle inequality, the Lipschitz continuity of  $k$ , and then the choice of the  
 506 sequence  $(M_n)_n$ .

507 Finally,

$$\begin{aligned}III &= |\hat{f}_M^{\text{pre}}(\hat{\mu}[\vec{x}]) - f_M(\vec{x})| \\ &= \left| \sum_{\ell=1}^{L_{n(M)}} \alpha_\ell^{(n(M))} k(\cdot, \hat{\mu}[\vec{x}_M^{(n(M), \ell)}]) - \sum_{\ell=1}^{L_{n(M)}} \alpha_\ell^{(n(M))} k_M(\cdot, \vec{x}_M^{(n(M), \ell)}) \right| \\ &\leq \sum_{\ell=1}^{L_{n(M)}} \left| \alpha_\ell^{(n(M))} \right| |k(\cdot, \hat{\mu}[\vec{x}_M^{(n(M), \ell)}]) - k_M(\cdot, \vec{x}_M^{(n(M), \ell)})| \\ &\leq \frac{\epsilon_{n(M)}}{3},\end{aligned}$$

508 where the triangle inequality has been used in the first step and then again the choice of the sequence  
 509  $(M_n)_n$ .

510 Altogether,

$$\begin{aligned} |f(\hat{\mu}[\vec{x}]) - f_M(\vec{x})| &\leq I + II + III \\ &\leq \frac{\epsilon_{n(M)}}{3} + \frac{\epsilon_{n(M)}}{3} + \frac{\epsilon_{n(M)}}{3} \\ &\leq \epsilon, \end{aligned}$$

511 establishing  $f_M \xrightarrow{\mathcal{P}_1} f$ .

512 **Step 3** We now show  $\limsup_{M \rightarrow \infty} \|f_M\|_M \leq \|f\|_k$ . Let  $\epsilon > 0$  be arbitrary and  $n_\epsilon \in \mathbb{N}$  such that  
 513  $\epsilon_n \leq \epsilon$  and let  $M \geq M_{n_\epsilon}$ . We have

$$\begin{aligned} \|f_M\|_M^2 &= \sum_{\ell, \ell'=1}^{L_{n(M)}} \alpha_\ell^{(n(M))} \alpha_{\ell'}^{(n(M))} k_M(\vec{x}_M^{(n(M), \ell')}, \vec{x}_M^{(n(M), \ell')}) \\ &\leq \sum_{\ell, \ell'=1}^{L_{n(M)}} \alpha_\ell^{(n(M))} \alpha_{\ell'}^{(n(M))} k(\mu_{\ell'}^{(n(M))}, \mu_\ell^{(n(M))}) + |R_1| + |R_2| \\ &= \|f_{n(M)}^{\text{pre}}\|_k^2 + R_1 + R_2 \\ &\leq \|f\|_k^2 + R_1 + R_2. \end{aligned}$$

514 with remainder terms

$$\begin{aligned} R_1 &= \sum_{\ell, \ell'=1}^{L_{n(M)}} \alpha_\ell^{(n(M))} \alpha_{\ell'}^{(n(M))} k_M(\vec{x}_M^{(n(M), \ell')}, \vec{x}_M^{(n(M), \ell')}) - \sum_{\ell, \ell'=1}^{L_{n(M)}} \alpha_\ell^{(n(M))} \alpha_{\ell'}^{(n(M))} k(\hat{\mu}[\vec{x}_M^{(n(M), \ell')}], \hat{\mu}[\vec{x}_M^{(n(M), \ell')}]) \\ R_2 &= \sum_{\ell, \ell'=1}^{L_{n(M)}} \alpha_\ell^{(n(M))} \alpha_{\ell'}^{(n(M))} k(\hat{\mu}[\vec{x}_M^{(n(M), \ell')}], \hat{\mu}[\vec{x}_M^{(n(M), \ell')}]) - \sum_{\ell, \ell'=1}^{L_{n(M)}} \alpha_\ell^{(n(M))} \alpha_{\ell'}^{(n(M))} k(\mu_{\ell'}^{(n(M))}, \mu_\ell^{(n(M))}) \end{aligned}$$

515 We now bound these terms, so that

$$\begin{aligned} R_1 &= \left| \sum_{\ell, \ell'=1}^{L_{n(M)}} \alpha_\ell^{(n(M))} \alpha_{\ell'}^{(n(M))} k_M(\vec{x}_M^{(n(M), \ell')}, \vec{x}_M^{(n(M), \ell')}) - \sum_{\ell, \ell'=1}^{L_{n(M)}} \alpha_\ell^{(n(M))} \alpha_{\ell'}^{(n(M))} k(\hat{\mu}[\vec{x}_M^{(n(M), \ell')}], \hat{\mu}[\vec{x}_M^{(n(M), \ell')}]) \right| \\ &\leq \sum_{\ell, \ell'=1}^{L_{n(M)}} |\alpha_\ell^{(n(M))}| |\alpha_{\ell'}^{(n(M))}| |k_M(\vec{x}_M^{(n(M), \ell')}, \vec{x}_M^{(n(M), \ell')}) - k(\hat{\mu}[\vec{x}_M^{(n(M), \ell')}], \hat{\mu}[\vec{x}_M^{(n(M), \ell')}])| \\ &\leq \frac{\epsilon_{n(M)}^2}{2}, \end{aligned}$$

516 and

$$\begin{aligned} R_2 &= \left| \sum_{\ell, \ell'=1}^{L_{n(M)}} \alpha_\ell^{(n(M))} \alpha_{\ell'}^{(n(M))} k(\hat{\mu}[\vec{x}_M^{(n(M), \ell')}], \hat{\mu}[\vec{x}_M^{(n(M), \ell')}]) - \sum_{\ell, \ell'=1}^{L_{n(M)}} \alpha_\ell^{(n(M))} \alpha_{\ell'}^{(n(M))} k(\mu_{\ell'}^{(n(M))}, \mu_\ell^{(n(M))}) \right| \\ &\leq \sum_{\ell, \ell'=1}^{L_{n(M)}} |\alpha_\ell^{(n(M))}| |\alpha_{\ell'}^{(n(M))}| |k(\hat{\mu}[\vec{x}_M^{(n(M), \ell')}], \hat{\mu}[\vec{x}_M^{(n(M), \ell')}]) - k(\mu_{\ell'}^{(n(M))}, \mu_\ell^{(n(M))})| \\ &\leq L_k \sum_{\ell, \ell'=1}^{L_{n(M)}} |\alpha_\ell^{(n(M))}| |\alpha_{\ell'}^{(n(M))}| \left( d_{\text{KR}}(\hat{\mu}[\vec{x}_M^{(n(M), \ell')}], \mu_\ell^{(n(M))}) + d_{\text{KR}}(\hat{\mu}[\vec{x}_M^{(n(M), \ell')}], \mu_{\ell'}^{(n(M))}) \right) \\ &\leq \frac{\epsilon_{n(M)}^2}{2}. \end{aligned}$$

517 Altogether,

$$\begin{aligned} \|f_M\|_M^2 &\leq \|f\|_k^2 + |R_1| + |R_2| \\ &\leq \|f\|_k^2 + \frac{\epsilon_{n(M)}^2}{2} + \frac{\epsilon_{n(M)}^2}{2} \\ &\leq \|f\|_k^2 + \epsilon^2, \end{aligned}$$

so  $\|f_M\|_M \leq \|f\|_k + \epsilon$  for all  $M \geq M_{n\epsilon}$ , and since  $\epsilon > 0$  was arbitrary, we finally get  
 $\limsup_{M \rightarrow \infty} \|f_M\|_M \leq \|f\|_k$ .  $\square$

Finally, we can now provide the proof for the central Theorem 2.3.

*Proof. of Theorem 2.3* The first statement is part of Lemma 2.5. Let us turn to the second statement:  
The existence of the subsequence  $(f_{M_\ell})_\ell$  and the continuous function  $f : \mathcal{P}(X) \rightarrow \mathbb{R}$  with  $f_{M_\ell} \xrightarrow{\mathcal{P}_1} f$   
was shown in [18, Corollary 4.3], so we only have to ensure that  $f \in H_k$  with  $\|f\|_k \leq B$ . For this,  
we use the characterization of RKHS functions from Theorem B.1. In particular, we will utilize the  
notation introduced there.

**Step 1** Let  $(\vec{\mu}, \vec{\alpha}) \in \mathcal{P}(X)^N \times \mathbb{R}^N$ . We show that if  $\mathcal{W}(\vec{\mu}, \vec{\alpha}, k) = 0$ , then  $\mathcal{E}(\vec{\mu}, \vec{\alpha}, f) = 0$ .

Assume that  $\mathcal{W}(\vec{\mu}, \vec{\alpha}, k) = 0$ . If  $B = 0$ , then  $f_M \equiv 0$  and  $f_{M_\ell} \xrightarrow{\mathcal{P}_1} f$  implies that  $f \equiv 0$ , so the  
claim is clear in this case. Assume now  $B > 0$ , let  $\epsilon > 0$  be arbitrary and for  $n = 1, \dots, N$ , choose  
sequences  $\vec{x}_n^{[M]} \in X^M$  such that  $\vec{x}_n^{[M]} \xrightarrow{d_{\text{KR}}} \mu_n$  for  $M \rightarrow \infty$ . For convenience, define  $\vec{X}^{[M]} =$   
 $(\vec{x}_1^{[M]} \dots \vec{x}_N^{[M]})$ . Choose now  $\ell_\epsilon \in \mathbb{N}$  such that for all  $M \geq M_{\ell_\epsilon}$  we get  $\mathcal{W}(\vec{X}^{[M]}, \vec{\alpha}, k_M) \leq$   
 $\epsilon/B$ . This is possible since  $k_M \xrightarrow{\mathcal{P}_1} k$  together with the continuity of  $k_M$  and  $k$  as well as  $\vec{x}_n^{[M]} \xrightarrow{d_{\text{KR}}}$   
 $\mu_n$  for  $M \rightarrow \infty$  and all  $n = 1, \dots, N$  implies that  $\mathcal{W}(\vec{X}^{[M]}, \vec{\alpha}, k_M) \rightarrow \mathcal{W}(\vec{\mu}, \vec{\alpha}, k) = 0$ . Let now  
 $\ell \geq \ell_\epsilon$  be arbitrary and observe that  $f_M \in H_M$  implies  $\mathcal{N}(f_M, k_M) < \infty$  according to Theorem  
B.1, so in particular  $\mathcal{D}(\vec{X}^{[M_\ell]}, \vec{\alpha}, f_{M_\ell}, k_{M_\ell}) < \infty$ .

If  $\mathcal{W}(\vec{X}^{[M_\ell]}, \vec{\alpha}, k_{M_\ell}) = 0$ , then we get that  $\mathcal{E}(\vec{X}^{[M_\ell]}, \vec{\alpha}, f_{M_\ell}) = 0 \leq \epsilon$  since  
 $\mathcal{D}(\vec{X}^{[M_\ell]}, \vec{\alpha}, f_{M_\ell}, k_{M_\ell}) < \infty$ , which implies by definition that  $\mathcal{E}(\vec{X}^{[M_\ell]}, \vec{\alpha}, f_{M_\ell}) = 0$ .

If  $\mathcal{W}(\vec{X}^{[M_\ell]}, \vec{\alpha}, k_{M_\ell}) > 0$ , then we have

$$\frac{\mathcal{E}(\vec{X}^{[M_\ell]}, \vec{\alpha}, f_{M_\ell})}{\mathcal{W}(\vec{X}^{[M_\ell]}, \vec{\alpha}, k_{M_\ell})} = \mathcal{D}(\vec{X}^{[M_\ell]}, \vec{\alpha}, f_{M_\ell}, k_{M_\ell}) \leq \mathcal{N}(f_{M_\ell}, k_{M_\ell}) = \|f_{M_\ell}\|_{M_\ell} \leq B,$$

which implies

$$\mathcal{E}(\vec{X}^{[M_\ell]}, \vec{\alpha}, f_{M_\ell}) \leq B \mathcal{W}(\vec{X}^{[M_\ell]}, \vec{\alpha}, k_{M_\ell}) \leq \epsilon.$$

Since  $f_{M_\ell} \xrightarrow{\mathcal{P}_1} f$  together with the continuity of  $f_M$  and  $f$  as well as  $\vec{x}_n^{[M]} \xrightarrow{d_{\text{KR}}} \mu_n$  implies that  
 $\mathcal{E}(\vec{X}^{[M_\ell]}, \vec{\alpha}, f_{M_\ell}) \rightarrow \mathcal{E}(\vec{\mu}, \vec{\alpha}, f)$ , we get that  $\mathcal{E}(\vec{\mu}, \vec{\alpha}, f) \leq \epsilon$ , and since  $\epsilon > 0$  was arbitrary we arrive  
at  $\mathcal{E}(\vec{\mu}, \vec{\alpha}, f) \leq 0$ .

Assume now that  $\mathcal{E}(\vec{\mu}, \vec{\alpha}, f) < 0$ . This implies that there exist  $\delta > 0$  and  $\ell_\delta \in \mathbb{N}$  such that for all  $\ell \geq$   
 $\ell_\delta$  we have  $\mathcal{E}(\vec{X}^{[M_\ell]}, \vec{\alpha}, f_{M_\ell}) \leq -\delta < 0$ , since  $\mathcal{E}(\vec{X}^{[M_\ell]}, \vec{\alpha}, f_{M_\ell}) \rightarrow \mathcal{E}(\vec{\mu}, \vec{\alpha}, f)$ . Let  $\ell \geq \ell_\delta$ , then we  
get that  $\mathcal{E}(\vec{X}^{[M_\ell]}, -\vec{\alpha}, f_{M_\ell}) \geq \delta > 0$  and we have  $\mathcal{W}(\vec{X}^{[M_\ell]}, -\vec{\alpha}, k_{M_\ell}) = \mathcal{W}(\vec{X}^{[M_\ell]}, \vec{\alpha}, k_{M_\ell}) > 0$ .  
We can then continue with

$$\begin{aligned} \frac{\delta}{\mathcal{W}(\vec{X}^{[M_\ell]}, \vec{\alpha}, k_{M_\ell})} &\leq \frac{\mathcal{E}(\vec{X}^{[M_\ell]}, -\vec{\alpha}, f_{M_\ell})}{\mathcal{W}(\vec{X}^{[M_\ell]}, -\vec{\alpha}, k_{M_\ell})} \\ &\leq \mathcal{D}(\vec{X}^{[M_\ell]}, -\vec{\alpha}, f_{M_\ell}, k_{M_\ell}) \\ &\leq \mathcal{N}(f_{M_\ell}, k_{M_\ell}) \\ &= \|f_{M_\ell}\|_{M_\ell} \leq B, \end{aligned}$$

which implies that  $\mathcal{W}(\vec{X}^{[M_\ell]}, -\vec{\alpha}, k_{M_\ell}) = \mathcal{W}(\vec{X}^{[M_\ell]}, \vec{\alpha}, k_{M_\ell}) \geq \delta/B$ . But since  
 $\mathcal{W}(\vec{X}^{[M_\ell]}, \vec{\alpha}, k_{M_\ell}) \rightarrow \mathcal{W}(\vec{\mu}, \vec{\alpha}, k)$ , this implies that  $\mathcal{W}(\vec{\mu}, \vec{\alpha}, k) \geq \delta/B > 0$ , a contradiction. Alto-  
gether,  $\mathcal{E}(\vec{\mu}, \vec{\alpha}, f) = 0$ .

**Step 2** Let  $(\vec{\mu}, \vec{\alpha}) \in \mathcal{P}(X)^N \times \mathbb{R}^N$ . If  $\mathcal{W}(\vec{\mu}, \vec{\alpha}, k) > 0$  and  $\mathcal{E}(\vec{\mu}, \vec{\alpha}, f) > 0$ , then

$$\frac{\mathcal{E}(\vec{\mu}, \vec{\alpha}, f)}{\mathcal{W}(\vec{\mu}, \vec{\alpha}, k)} \leq B.$$

550 To show this, let  $\alpha > 1$  and  $\beta \in (0, 1)$  be arbitrary. Define

$$\begin{aligned}\epsilon_\alpha &= \frac{\alpha - 1}{\alpha} \mathcal{E}(\vec{\mu}, \vec{\alpha}, f) \\ \epsilon_\beta &= (1/\beta - 1) \mathcal{W}(\vec{\mu}, \vec{\alpha}, k)\end{aligned}$$

551 and observe that  $\epsilon_\alpha, \epsilon_\beta > 0$ . Furthermore, for all  $n = 1, \dots, N$  choose a sequence  $\vec{x}_n^{[M]} \in X^M$  such  
 552 that  $\vec{x}_n^{[M]} \xrightarrow{d_{\text{KR}}} \mu_n$  for  $M \rightarrow \infty$ , and define  $\vec{X}^{[M]} = \begin{pmatrix} \vec{x}_1^{[M]} & \dots & \vec{x}_N^{[M]} \end{pmatrix}$ . Choose  $\ell_\epsilon \in \mathbb{N}_+$  such that  
 553 for all  $\ell \geq \ell_\epsilon$  we have

$$\begin{aligned}|\mathcal{E}(\vec{X}^{[M_\ell]}, \vec{\alpha}, f_{M_\ell}) - \mathcal{E}(\vec{\mu}, \vec{\alpha}, f)| &\leq \epsilon_\alpha \\ |\mathcal{W}(\vec{X}^{[M_\ell]}, \vec{\alpha}, k_{M_\ell}) - \mathcal{W}(\vec{\mu}, \vec{\alpha}, k)| &\leq \epsilon_\beta\end{aligned}$$

554 and  $\mathcal{W}(\vec{X}^{[M_\ell]}, \vec{\alpha}, k_{M_\ell}) > 0$ . Such an  $\ell_\epsilon$  exists because  $k_M \xrightarrow{\mathcal{P}_1} k$  together with the continuity of  $k_M$   
 555 and  $k$  as well as the convergence of  $\vec{x}_n^{[M]}$  to  $\mu_n$  imply that  $\mathcal{W}(\vec{X}^{[M_\ell]}, \vec{\alpha}, k_{M_\ell}) \rightarrow \mathcal{W}(\vec{\mu}, \vec{\alpha}, k)$ , and  
 556  $f_{M_\ell} \xrightarrow{\mathcal{P}_1} f$  together with the continuity of  $f_M$  and  $f$  imply that  $\mathcal{E}(\vec{X}^{[M_\ell]}, \vec{\alpha}, f_{M_\ell}) \rightarrow \mathcal{E}(\vec{\mu}, \vec{\alpha}, f)$ .

557 Let now  $\ell \geq \ell_\epsilon$  be arbitrary. By definition of  $\epsilon_\alpha$  we get  $\alpha \epsilon_\alpha \leq (\alpha - 1) \mathcal{E}(\vec{\mu}, \vec{\alpha}, f)$ , which in turn leads to  
 558

$$\begin{aligned}\epsilon_\alpha &\leq \epsilon_\alpha - \alpha \epsilon_\alpha + (\alpha - 1) \mathcal{E}(\vec{\mu}, \vec{\alpha}, f) \\ &= -(\alpha - 1) \epsilon_\alpha + (\alpha - 1) \mathcal{E}(\vec{\mu}, \vec{\alpha}, f) \\ &= (\alpha - 1) (\mathcal{E}(\vec{\mu}, \vec{\alpha}, f) - \epsilon_\alpha) \\ &\leq (\alpha - 1) \mathcal{E}(\vec{X}^{[M_\ell]}, \vec{\alpha}, f_{M_\ell}),\end{aligned}$$

559 where we used in the last inequality that  $\alpha - 1 > 0$  and by choice of  $\ell_\epsilon$  we have  $\mathcal{E}(\vec{\mu}, \vec{\alpha}, f) \leq$   
 560  $\mathcal{E}(\vec{X}^{[M_\ell]}, \vec{\alpha}, f_{M_\ell}) + \epsilon_\alpha$ . We can then continue with

$$\begin{aligned}\mathcal{E}(\vec{\mu}, \vec{\alpha}, f) &\leq \mathcal{E}(\vec{X}^{[M_\ell]}, \vec{\alpha}, f_{M_\ell}) + \epsilon_\alpha \\ &\leq \mathcal{E}(\vec{X}^{[M_\ell]}, \vec{\alpha}, f_{M_\ell}) + (\alpha - 1) \mathcal{E}(\vec{X}^{[M_\ell]}, \vec{\alpha}, f_{M_\ell}) \\ &= \alpha \mathcal{E}(\vec{X}^{[M_\ell]}, \vec{\alpha}, f_{M_\ell}).\end{aligned}$$

561 Next, by definition of  $\epsilon_\beta$  and choice of  $\ell_\epsilon$  we find that

$$\begin{aligned}\mathcal{W}(\vec{X}^{[M_\ell]}, \vec{\alpha}, k_{M_\ell}) &\leq \mathcal{W}(\vec{\mu}, \vec{\alpha}, k) + \epsilon_\beta \\ &= \mathcal{W}(\vec{\mu}, \vec{\alpha}, k) + (1/\beta - 1) \mathcal{W}(\vec{\mu}, \vec{\alpha}, k) \\ &= (1/\beta) \mathcal{W}(\vec{\mu}, \vec{\alpha}, k),\end{aligned}$$

562 hence

$$\frac{1}{\mathcal{W}(\vec{\mu}, \vec{\alpha}, k)} \leq \frac{1}{\beta \mathcal{W}(\vec{X}^{[M_\ell]}, \vec{\alpha}, k_{M_\ell})}.$$

563 Combining these results, we get that for all  $\ell \geq \ell_\epsilon$

$$\frac{\mathcal{E}(\vec{\mu}, \vec{\alpha}, f)}{\mathcal{W}(\vec{\mu}, \vec{\alpha}, k)} \leq \frac{\alpha}{\beta} \frac{\mathcal{E}(\vec{X}^{[M_\ell]}, \vec{\alpha}, f_{M_\ell})}{\mathcal{W}(\vec{X}^{[M_\ell]}, \vec{\alpha}, k_{M_\ell})} \leq \frac{\alpha}{\beta} \mathcal{N}(f_{M_\ell}, k_{M_\ell}) = \frac{\alpha}{\beta} \|f_{M_\ell}\|_{M_\ell} \leq \frac{\alpha}{\beta} B.$$

564 Since  $\alpha > 1$  and  $\beta \in (0, 1)$  were arbitrary, this shows that

$$\frac{\mathcal{E}(\vec{\mu}, \vec{\alpha}, f)}{\mathcal{W}(\vec{\mu}, \vec{\alpha}, k)} \leq B.$$

565 **Step 3** Let  $(\vec{\mu}, \vec{\alpha}) \in \mathcal{P}(X)^N \times \mathbb{R}^N$  be arbitrary. If  $\mathcal{W}(\vec{\mu}, \vec{\alpha}, k) = 0$ , then we get from Step 1 that  
 566  $\mathcal{E}(\vec{\mu}, \vec{\alpha}, f) = 0 \leq B$ . Assume now  $\mathcal{W}(\vec{\mu}, \vec{\alpha}, k) > 0$ . If  $\mathcal{E}(\vec{\mu}, \vec{\alpha}, f) = 0$ , then again  $\mathcal{E}(\vec{\mu}, \vec{\alpha}, f) = 0 \leq$   
 567  $B$ . If  $\mathcal{E}(\vec{\mu}, \vec{\alpha}, f) > 0$ , then Step 2 ensures that

$$\frac{\mathcal{E}(\vec{\mu}, \vec{\alpha}, f)}{\mathcal{W}(\vec{\mu}, \vec{\alpha}, k)} = \mathcal{D}(\vec{\mu}, \vec{\alpha}, f, k) \leq B.$$

568 Finally, if  $\mathcal{E}(\vec{\mu}, \vec{\alpha}, f) < 0$ , then again

$$\frac{\mathcal{E}(\vec{\mu}, \vec{\alpha}, f)}{\mathcal{W}(\vec{\mu}, \vec{\alpha}, k)} = \mathcal{D}(\vec{\mu}, \vec{\alpha}, f, k) < 0 \leq B.$$

569 Altogether, we get that  $\mathcal{D}(\vec{\mu}, \vec{\alpha}, f, k) \leq B$ . Since  $(\vec{\mu}, \vec{\alpha})$  was arbitrary, maximization leads to  
 570  $\mathcal{N}(f, k) \leq B < \infty$ , hence  $f \in H_k$  and  $\|f\|_k = \mathcal{N}(f, k) \leq B$ .  $\square$

## 571 A.2 Proofs for Section 3

572 In this section we provide the proofs for the results relating to approximation with kernels in the  
573 mean field limit.

574 *Proof. of Proposition 3.1* Let  $f \in \mathcal{F}$  and  $\epsilon > 0$  be arbitrary. Let  $B \in \mathbb{R}_{\geq 0}$  and  $f_M \in \mathcal{F}_M$ ,  
575  $\hat{f}_M \in H_M$ ,  $M \in \mathbb{N}_+$ , such that  $f_M \xrightarrow{\mathcal{P}_1} f$ ,  $\|f_M - \hat{f}_M\| \leq \frac{\epsilon}{5}$  and  $\|\hat{f}_M\|_M \leq B$  for all  $M \in \mathbb{N}_+$   
576 (exist by definition of  $\mathcal{F}$ ). Theorem 2.3 ensures that there exists a subsequence  $(f_{M_\ell})_\ell$  and  $\hat{f} \in H_k$   
577 with  $\|\hat{f}\|_k \leq B$  such that  $\hat{f}_{M_\ell} \xrightarrow{\mathcal{P}_1} \hat{f}$  for  $\ell \rightarrow \infty$ . Choose now  $L_1 \in \mathbb{N}_+$  such that for all  $\ell \geq L_1$  we  
578 have

$$\sup_{\vec{x} \in X^{M_\ell}} |\hat{f}_{M_\ell}(\vec{x}) - \hat{f}(\hat{\mu}[\vec{x}])| \leq \frac{\epsilon}{5}$$

$$\sup_{\vec{x} \in X^{M_\ell}} |f_{M_\ell}(\vec{x}) - f(\hat{\mu}[\vec{x}])| \leq \frac{\epsilon}{5}.$$

579 Let now  $\mu \in \mathcal{P}(X)$  be arbitrary and choose a sequence  $\vec{x}_M \in X^M$  with  $\hat{\mu}[\vec{x}_M] \xrightarrow{d_{\text{KR}}} \mu$ . Finally, let  
580  $L_2 \in \mathbb{N}_+$  such that for all  $\ell \geq L_2$  we have

$$|f(\mu) - f(\hat{\mu}[\vec{x}_{M_\ell}])| \leq \frac{\epsilon}{5}$$

$$|\hat{f}(\mu) - \hat{f}(\hat{\mu}[\vec{x}_{M_\ell}])| \leq \frac{\epsilon}{5}$$

581 (such an  $L_2$  exists due to the continuity of  $f$  and  $\hat{f}$ ).

582 We now have for  $\ell \geq \max\{L_1, L_2\}$  that

$$\begin{aligned} |f(\mu) - \hat{f}(\mu)| &\leq |f(\mu) - f(\hat{\mu}[\vec{x}_{M_\ell}])| + |f(\hat{\mu}[\vec{x}_{M_\ell}]) - f_{M_\ell}(\vec{x}_{M_\ell})| + |f_{M_\ell}(\vec{x}_{M_\ell}) - \hat{f}_{M_\ell}(\vec{x}_{M_\ell})| \\ &\quad + |\hat{f}_{M_\ell}(\vec{x}_{M_\ell}) - \hat{f}(\hat{\mu}[\vec{x}_{M_\ell}])| + |\hat{f}(\hat{\mu}[\vec{x}_{M_\ell}]) - \hat{f}(\mu)| \\ &\leq \frac{\epsilon}{5} + \frac{\epsilon}{5} + \frac{\epsilon}{5} + \frac{\epsilon}{5} + \frac{\epsilon}{5} = \epsilon. \end{aligned}$$

583 Since  $\mu$  was arbitrary, the result follows.  $\square$

584 *Proof. of Remark 3.2* We first show that  $\mathcal{F}$  is a subvectorspace. Let  $f, g \in \mathcal{F}$  and  $\lambda \in \mathbb{R}$ ,  $\epsilon > 0$   
585 be arbitrary. W.l.o.g. we can assume  $\lambda \neq 0$ . Choose sequences  $f_M, g_M \in \mathcal{F}_M$ ,  $\hat{f}_M, \hat{g}_M \in H_M$ ,  
586  $M \in \mathbb{N}_+$ , and constants  $B_f, B_g \in \mathbb{R}_{\geq 0}$  from the definition of  $\mathcal{F}$  for  $f, \frac{\epsilon}{2|\lambda|}$ , and  $g, \frac{\epsilon}{2}$ , respectively.  
587 Let  $M \in \mathbb{N}_+$ ,  $\vec{x} \in X^M$  be arbitrary, then

$$|\lambda f_M(\vec{x}) + g(\vec{x}) - (\lambda f(\hat{\mu}[\vec{x}]) + g(\hat{\mu}[\vec{x}]))| \leq |\lambda| |f_M(\vec{x}) - f(\hat{\mu}[\vec{x}])| + |g_M(\vec{x}) - g(\hat{\mu}[\vec{x}])|$$

588 together with  $f_M \xrightarrow{\mathcal{P}_1} f$ ,  $g_M \xrightarrow{\mathcal{P}_1} g$  shows that  $\lambda f_M + g_M \xrightarrow{\mathcal{P}_1} \lambda f + g$ .

589 Next, we have for all  $M \in \mathbb{N}_+$  that

$$\|(\lambda f_M + g_M) - (\lambda \hat{f}_M + \hat{g}_M)\|_\infty \leq |\lambda| \|f_M - \hat{f}_M\|_\infty + \|g_M - \hat{g}_M\|_\infty \leq |\lambda| \frac{\epsilon}{2|\lambda|} + \frac{\epsilon}{2} = \epsilon.$$

590 Finally,

$$\|\lambda \hat{f}_M + \hat{g}_M\|_M \leq |\lambda| \|\hat{f}_M\|_M + \|\hat{g}_M\|_M \leq |\lambda| B_f + B_g,$$

591 establishing that  $(\lambda \hat{f}_M + \hat{g}_M)_M$  is uniformly norm-bounded. Altogether, we have that  $\lambda f + g \in \mathcal{F}$ .

592 We now turn to the second claim. Let  $(f^{(n)})_n \subseteq \mathcal{F}$  such that  $f^{(n)} \rightarrow f$  for some  $f \in C^0(\mathcal{P}(X), \mathbb{R})$   
593 and for all  $\bar{\epsilon} > 0$  there exist  $f_M^{(n)} \in \mathcal{F}_M$ ,  $\hat{f}_M^{(n)} \in H_M$ ,  $(\rho_M)_M \subseteq \mathbb{R}_{\geq 0}$  and  $B^{(n)} \in \mathbb{R}_{\geq 0}$  with  
594  $\rho_M \searrow 0$ ,  $\|f_M^{(n)} - \hat{f}_M^{(n)}\|_\infty \leq \bar{\epsilon}$  and  $\|\hat{f}_M^{(n)}\|_M \leq B^{(n)}$  for all  $n, M \in \mathbb{N}_+$ , and

$$\sup_{\vec{x} \in X^M} |f_M^{(n)}(\vec{x}) - f^{(n)}(\hat{\mu}[\vec{x}])| \leq \rho_M$$

for all  $n, M \in \mathbb{N}_+$ . We now show that  $f \in \mathcal{F}$ . For this, let  $\epsilon > 0$  be arbitrary and choose  $f_M^{(n)} \in \mathcal{F}_M$ ,  $\hat{f}_M^{(n)} \in H_M$ ,  $(\rho_M)_M \subseteq \mathbb{R}_{\geq 0}$  and  $B^{(n)} \in \mathbb{R}_{\geq 0}$  as above with  $\bar{\epsilon} = \frac{\epsilon}{4}$ . Let  $N \in \mathbb{N}_+$  be such that  $\|f^{(m)} - f^{(n)}\|_\infty \leq \frac{\epsilon}{4}$  for all  $m, n \geq N$  (such an  $N$  exists since  $(f^{(n)})_n$  converges in  $C^0(\mathcal{P}(X), \mathbb{R})$  and hence is a Cauchy sequence). Furthermore, let  $M_\rho \in \mathbb{N}_+$  be such that for all  $M \geq M_\rho$  we have  $\rho_M \leq \frac{\epsilon}{4}$ . Define now  $f_M = f_M^{(M)}$  and  $\hat{f}_M = \hat{f}_M^{(M)}$  for  $M = 1, \dots, M_\rho - 1$ , and  $f_M = f_M^{(M+N)}$ ,  $\hat{f}_M = \hat{f}_M^{(N)}$  for  $M \geq M_\rho$ .

**Step 1** Let  $M \geq M_\rho$  and  $\vec{x} \in X^M$  be arbitrary. We have

$$\begin{aligned} |f_M(\vec{x}) - f(\hat{\mu}[\vec{x}])| &= |f_M^{(N+M)}(\vec{x}) - f(\hat{\mu}[\vec{x}])| \\ &\leq |f_M^{(N+M)}(\vec{x}) - f^{(N+M)}(\hat{\mu}[\vec{x}])| + |f^{(N+M)}(\hat{\mu}[\vec{x}]) - f(\hat{\mu}[\vec{x}])| \\ &\leq \rho_M + \|f^{(N+M)} - f\|_\infty, \end{aligned}$$

and since the right hand side (which is independent of  $\vec{x}$ ) converges to 0 for  $M \rightarrow \infty$ , we get  $f_M \xrightarrow{\mathcal{P}_1} f$ .

**Step 2** For  $M = 1, \dots, M_\rho$  we get

$$\|f_M - \hat{f}_M\|_\infty = \|f_M^{(M)} - \hat{f}_M^{(M)}\|_\infty \leq \bar{\epsilon} \leq \epsilon.$$

Let now  $M \geq M_\rho$  and  $\vec{x} \in X^M$  be arbitrary. We have

$$\begin{aligned} |f_M(\vec{x}) - \hat{f}_M(\vec{x})| &= |f_M^{(M+N)}(\vec{x}) - \hat{f}_M^{(N)}(\vec{x})| \\ &\leq |f_M^{(M+N)}(\vec{x}) - f^{(N+M)}(\hat{\mu}[\vec{x}])| + |f^{(N+M)}(\hat{\mu}[\vec{x}]) - f^{(N)}(\hat{\mu}[\vec{x}])| \\ &\quad + |f^{(N)}(\hat{\mu}[\vec{x}]) - \hat{f}_M^{(N)}(\vec{x})| + |f_M^{(N)}(\vec{x}) - \hat{f}_M^{(N)}(\vec{x})| \\ &\leq \sup_{\vec{x}' \in X^M} |f_M^{(M+N)}(\vec{x}') - f^{(M+N)}(\hat{\mu}[\vec{x}'])| + \|f^{(M+N)} - f^{(N)}\|_\infty \\ &\quad + \sup_{\vec{x}' \in X^M} |f^{(N)}(\hat{\mu}[\vec{x}']) - f_M^{(N)}(\vec{x}')| + \|f_M^{(N)} - \hat{f}_M^{(N)}\|_\infty \\ &\leq \rho_M + \frac{\epsilon}{4} + \rho_M + \bar{\epsilon} \\ &\leq 4\frac{\epsilon}{4} = \epsilon, \end{aligned}$$

and since  $\vec{x} \in X^M$  was arbitrary, we get  $\|f_M - \hat{f}_M\|_\infty \leq \epsilon$ .

**Step 3** For  $M = 1, \dots, M_\rho - 1$  we get by construction that  $\|\hat{f}_M\|_M = \|\hat{f}_M^{(M)}\|_M \leq B^{(M)}$ , and for  $M \geq M_\rho$  we find  $\|\hat{f}_M\|_M = \|\hat{f}_M^{(N)}\|_M \leq B^{(N)}$ . Altogether, we get for  $M \in \mathbb{N}_+$  that

$$\|\hat{f}_M\|_M \leq \max\{B^{(1)}, \dots, B^{(M_\rho-1)}, B^{(N)}\}.$$

Combining the three steps establishes that  $f \in \mathcal{F}$ . □

Finally, here is the proof of the representer theorem in the mean field limit.

*Proof. of Theorem 3.3* The existence and uniqueness of  $f_M$  and  $f$  follows from the well-known representer theorem (applied to all  $k_M$  and  $k$ ).

We now turn to the convergence of the minimizers. For all  $M \in \mathbb{N}_+$  we have

$$\lambda \|f_M^*\|_M \leq L(f_M^*(\vec{x}_1^{[M]}), \dots, f_M^*(\vec{x}_N^{[M]})) + \lambda \|f\|_M \leq L(0, \dots, 0),$$

i.e.,  $\|f_M^*\|_M \leq L(0, \dots, 0)/\lambda$ . Define

$$\begin{aligned} \mathcal{L}_M : H_M &\rightarrow \mathbb{R}_{\geq 0}, f \mapsto L(f(\vec{x}_1^{[M]}), \dots, f(\vec{x}_N^{[M]})) + \lambda \|f\|_M \\ \mathcal{L} : H_k &\rightarrow \mathbb{R}_{\geq 0}, f \mapsto L(f(\mu_1), \dots, f(\mu_N)) + \lambda \|f\|_k, \end{aligned}$$

and let  $f_M \in H_M$  with  $f_M \xrightarrow{\mathcal{P}_1} f$  for some  $f \in H_k$ . The continuity of  $f_M$ ,  $f$  and  $L$  as well as  $\vec{x}_n^{[M]} \xrightarrow{d_{\text{KR}}} \mu_n$  for  $M \rightarrow \infty$  and all  $n = 1, \dots, N$ , imply then that

617  $\lim_{M \rightarrow \infty} L(f_M(\vec{x}_1^{[M]}), \dots, f_M(\vec{x}_N^{[M]})) = L(f(\mu_1), \dots, f(\mu_N))$ . Combining this with Lemma  
 618 2.4 leads to

$$\mathcal{L}(f) \leq \liminf_{M \rightarrow \infty} \mathcal{L}_M(f).$$

619 Let now  $f \in H_k$  be arbitrary and let  $f_M \in H_M$  be the sequence from Lemma 2.5. Using the same  
 620 arguments as above we find that

$$\limsup_{M \rightarrow \infty} \mathcal{L}_M(f_M) \leq \|f\|_k.$$

621 We have shown that  $\mathcal{L}_M \xrightarrow{\Gamma} \mathcal{L}$  and hence Proposition B.3 ensures that there exists a subsequence  
 622  $(f_{M_\ell}^*)_\ell$  such that  $f_{M_\ell}^* \xrightarrow{\mathcal{P}_1} f^*$  and  $\mathcal{L}_{M_\ell}(f_{M_\ell}^*) \rightarrow \mathcal{L}(f^*)$ .  $\square$

### 623 A.3 Proofs for Section 4

624 *Proof. of Lemma 4.2* That  $\ell$  is nonnegative is clear from the proof of Proposition 2.1. Let now  
 625 all  $\ell_M$  be convex and let  $\mu \in \mathcal{P}(X)$ ,  $y \in Y$ ,  $t_1, t_2 \in \mathbb{R}$  and  $\lambda \in (0, 1)$  be arbitrary, and define  
 626  $I = [\min\{t_1, t_2\}, \max\{t_1, t_2\}]$ . Furthermore, let  $\vec{x}_M \in X^M$  with  $\vec{x}_M \xrightarrow{d_{\text{KR}}} \mu$  for  $M \rightarrow \infty$  and  
 627  $\epsilon > 0$  be arbitrary. Choose now  $M$  so large that

$$\begin{aligned} |\ell(\mu, y, \lambda t_1 + (1 - \lambda)t_2) - \ell(\hat{\mu}[\vec{x}_M], y, \lambda t_1 + (1 - \lambda)t_2)| &\leq \frac{\epsilon}{6} \sup_{\substack{\vec{x} \in X^M \\ y' \in Y, t \in I}} |\ell_M(\vec{x}, y', t) - \ell(\hat{\mu}[\vec{x}], y', t)| \\ &\leq \frac{\epsilon}{6}. \end{aligned}$$

628 This is possible due to the continuity of  $\ell$ , as well as  $\ell_M \xrightarrow{\mathcal{P}_1} \ell$ . We then have

$$\begin{aligned} \ell(\mu, y, \lambda t_1 + (1 - \lambda)t_2) &\leq \ell(\hat{\mu}[\vec{x}], y, \lambda t_1 + (1 - \lambda)t_2) + \frac{\epsilon}{6} \\ &\leq \ell_M(\vec{x}_M, y, \lambda t_1 + (1 - \lambda)t_2) + \frac{\epsilon}{3} \\ &\leq \lambda \ell_M(\vec{x}_M, y, t_1) + (1 - \lambda) \ell_M(\vec{x}_M, y, t_2) + \frac{\epsilon}{3} \\ &\leq \lambda \ell(\hat{\mu}[\vec{x}_M], y, t_1) + (1 - \lambda) \ell(\hat{\mu}[\vec{x}_M], y, t_2) + \frac{\epsilon}{3} + (\lambda + 1 - \lambda) \frac{\epsilon}{6} \\ &\leq \lambda \ell(\mu, y, t_1) + (1 - \lambda) \ell(\mu, y, t_2) + \epsilon, \end{aligned}$$

629 and since  $\epsilon > 0$  was arbitrary, this establishes

$$\ell(\mu, y, \lambda t_1 + (1 - \lambda)t_2) \leq \lambda \ell(\mu, y, t_1) + (1 - \lambda) \ell(\mu, y, t_2),$$

630 i.e., convexity of  $\ell$ .  $\square$

631 *Proof. of Proposition 4.3* From Lemma 4.2 we get that  $\ell$  is nonnegative and convex. The existence,  
 632 uniqueness and the representation formulas follow then from the standard representer theorem, cf.  
 633 e.g., [30, Theorem 5.5].

634 Furthermore, for all  $M \in \mathbb{N}_+$  we have

$$\begin{aligned} \lambda \|f_{M,\lambda}^*\|_M^2 &\leq \frac{1}{N} \sum_{n=1}^N \ell_M(\vec{x}_n^{[M]}, y_n^{[M]}, f_{M,\lambda}^*(\vec{x}_n^{[M]})) + \lambda \|f_{M,\lambda}^*\|_M^2 \\ &\leq \mathcal{R}_{\ell_M, D_N^{[M]}, \lambda}(0) \\ &\leq NC_\ell, \end{aligned}$$

635 hence  $\|f_{M,\lambda}^*\|_M \leq \sqrt{\frac{NC_\ell}{\lambda}}$ .

636 Let  $f \in H_k$  and  $(f_M)_M$ ,  $f_M \in H_M$ , such that  $f_M \xrightarrow{\mathcal{P}_1} f$ . From  $D_N^{[M]} \xrightarrow{\mathcal{P}_1} D_N$  and the continuity  
 637 of  $\ell_M$ ,  $\ell$ , together with  $\ell_M \xrightarrow{\mathcal{P}_1} \ell$  and the boundedness of  $\{y_n^{[M]} \mid M \in \mathbb{N}_+, n = 1, \dots, N\} \subseteq Y$   
 638 and  $\{f_M(\vec{x}_n^{[M]}) \mid M \in \mathbb{N}_+, n = 1, \dots, N\}$  we find that

$$\lim_M \frac{1}{N} \sum_{n=1}^N \ell_M(\vec{x}_n^{[M]}, y_n^{[M]}, f_M(\vec{x}_n^{[M]})) = \frac{1}{N} \sum_{n=1}^N \ell(\mu_n, y_n, f(\mu_n)).$$

639 Combining this with Lemma 2.4 and Lemma 2.5 then establishes that  $\mathcal{R}_{\ell_M, D_N^{[M]}, \lambda} \xrightarrow{\Gamma} \mathcal{R}_{\ell, D_N, \lambda}$  and  
 640 the remaining claims follow from Proposition B.3 and the uniqueness of the minimizers.  $\square$

641 *Proof. of Lemma 4.4* Let  $\epsilon > 0$  be arbitrary. Recall from the proof of Proposition 4.3 that for all  
 642  $M \in \mathbb{N}_+$  we have  $\|f_{M, \lambda}^*\|_M \leq \sqrt{\frac{NC_\ell}{\lambda}}$ , and hence for all  $\vec{x} \in X^M$  we have

$$\begin{aligned} |f_{M, \lambda}^*(\vec{x})| &\leq \|f_{M, \lambda}^*\|_k \|k_M(\cdot, \vec{x})\|_k \\ &\leq \sqrt{\frac{NC_\ell}{\lambda}} \sqrt{C_k}. \end{aligned}$$

643 A similar argument applies to  $f_\lambda^* \in H_k$ , so we can find a compact set  $K \subseteq \mathbb{R}$  with

$$\{f_{M, \lambda}^*(\vec{x}_n^{[M]}) \mid M \in \mathbb{N}_+, n = 1, \dots, N\} \cup \{f_\lambda^*(\mu_n) \mid n = 1, \dots, N\} \subseteq K.$$

644 Choose now  $m_\epsilon \in \mathbb{N}_+$  such that for all  $m \geq m_\epsilon$  we have

$$\sup_{\substack{\vec{x} \in X^{M_m} \\ y \in Y}} |\ell_{M_m}(\vec{x}, y, f_{M_m, \lambda}^*(\vec{x})) - \ell_{M_m}(\vec{x}, y, f_\lambda^*(\hat{\mu}[\vec{x}]))| \leq \frac{\epsilon}{3}$$

$$\sup_{\substack{\vec{x} \in X^{M_m} \\ y \in Y, t \in K}} |\ell_{M_m}(\vec{x}, y, t) - \ell(\hat{\mu}[\vec{x}], y, t)| \leq \frac{\epsilon}{3}$$

$$\left| \int_{X^{M_m} \times Y} \ell(\hat{\mu}[\vec{x}], y, f_\lambda^*(\hat{\mu}[\vec{x}])) dP^{[M_m]}(\vec{x}, y) - \int_{\mathcal{P}(X) \times Y} \ell(\mu, y, f_\lambda^*(\mu)) d(\mu, y) \right| \leq \frac{\epsilon}{3}.$$

645 Such a  $m_\epsilon$  exists since  $f_{M_m, \lambda}^* \xrightarrow{P_1} f_\lambda^*$  and all  $\ell_{M_m}$  are uniformly Lipschitz continuous (first inequality),  $\ell_{M_m} \xrightarrow{P_1} \ell$  and  $Y$  and  $K$  are compact (second inequality), and  $P^{[M]} \xrightarrow{P_1} P$  as well as that  
 646  $(\mu, y) \mapsto \ell(\mu, y, f_\lambda^*(\mu))$  is continuous and bounded (third inequality). We now have  
 647

$$\begin{aligned} &\left| \mathcal{R}_{\ell_{M_m}, P^{[M_m]}}(f_{M_m, \lambda}^*) - \mathcal{R}_{\ell, P}(f_\lambda^*) \right| \\ &\leq \left| \int_{X^{M_m} \times Y} \ell_{M_m}(\vec{x}, y, f_{M_m, \lambda}^*(\vec{x})) - \ell_{M_m}(\vec{x}, y, f_\lambda^*(\hat{\mu}[\vec{x}])) dP^{[M_m]}(\vec{x}, y) \right| \\ &\quad + \left| \int_{X^{M_m} \times Y} \ell_{M_m}(\vec{x}, y, f_\lambda^*(\hat{\mu}[\vec{x}])) - \ell(\hat{\mu}[\vec{x}], y, f_\lambda^*(\hat{\mu}[\vec{x}])) dP^{[M_m]}(\vec{x}, y) \right| \\ &\quad + \left| \int_{X^{M_m} \times Y} \ell(\hat{\mu}[\vec{x}], y, f_\lambda^*(\hat{\mu}[\vec{x}])) dP^{[M_m]}(\vec{x}, y) - \int_{\mathcal{P}(X) \times Y} \ell(\mu, y, f_\lambda^*(\mu)) d(\mu, y) \right| \\ &\leq \int_{X^{M_m} \times Y} |\ell_{M_m}(\vec{x}, y, f_{M_m, \lambda}^*(\vec{x})) - \ell_{M_m}(\vec{x}, y, f_\lambda^*(\hat{\mu}[\vec{x}]))| dP^{[M_m]}(\vec{x}, y) \\ &\quad + \int_{X^{M_m} \times Y} |\ell_{M_m}(\vec{x}, y, f_\lambda^*(\hat{\mu}[\vec{x}])) - \ell(\hat{\mu}[\vec{x}], y, f_\lambda^*(\hat{\mu}[\vec{x}]))| dP^{[M_m]}(\vec{x}, y) \\ &\quad + \frac{\epsilon}{3} \\ &\leq \epsilon, \end{aligned}$$

648 and since  $\epsilon > 0$  was arbitrary, the claim follows.  $\square$

649 *Proof. of Proposition 4.5* Observe that all  $k_M$  are bounded measurable kernels,  $\mathcal{R}_{\ell_M, P^{[M]}}(f_M) < \infty$   
 650 for all  $f \in H_M$ ,  $\ell_M$  is a convex,  $P^{[M]}$ -integrable Nemitskii loss (cf. Remark 4.1) and hence [30,  
 651 Lemma 5.1, Theorem 5.2] guarantee the existence and uniqueness of  $f_{M, \lambda}^*$ . A completely analogous  
 652 argument shows the existence and uniqueness of  $f_\lambda^*$ .

653 We now show that  $\mathcal{R}_{\ell_M, P^{[M]}, \lambda} \xrightarrow{\Gamma} \mathcal{R}_{\ell, P, \lambda}$ . For the  $\Gamma$ -lim inf-inequality, let  $f_M \in H_M$ ,  $f \in H_k$  be  
 654 arbitrary with  $f_M \xrightarrow{P_1} f$ , and let  $\epsilon > 0$ . Choose  $M_\epsilon \in \mathbb{N}_+$  so large that for all  $M \geq M_\epsilon$

$$\left| \int \ell(\hat{\mu}[\vec{x}], y, f(\hat{\mu}[\vec{x}])) dP^{[M]}(\vec{x}, y) - \int \ell(\mu, y, f(\mu)) dP(\mu, y) \right| \leq \frac{\epsilon}{2}$$

(this is possible since  $(\mu, y) \mapsto \ell(\mu, y, f(\mu))$  is bounded and continuous and  $P^{[M]} \xrightarrow{\mathcal{P}_1} P$ ) and

$$|\ell_M(\vec{x}, y, f_M(\vec{x})) - \ell(\hat{\mu}[\vec{x}], y, f(\hat{\mu}[\vec{x}]))| \leq \frac{\epsilon}{2}$$

for all  $\vec{x} \in X^M$ ,  $y \in Y$  (this is possible due to the same argument used in the proof of Lemma 4.4).

For  $M \geq M_\epsilon$  we then find

$$\begin{aligned} \mathcal{R}_{\ell, P, \lambda}(f) &= \int \ell(\mu, y, f(\mu)) dP(\mu, y) + \lambda \|f\|_k^2 \\ &\leq \int \ell_M(\vec{x}, y, f_M(\vec{x})) dP^{[M]}(\vec{x}, y) \\ &\quad + \left| \int \ell(\hat{\mu}[\vec{x}], y, f(\hat{\mu}[\vec{x}])) dP^{[M]}(\vec{x}, y) - \int \ell(\mu, y, f(\mu)) dP(\mu, y) \right| \\ &\quad + \left| \int \ell_M(\vec{x}, y, f_M(\vec{x})) - \ell(\hat{\mu}[\vec{x}], y, f(\hat{\mu}[\vec{x}])) dP^{[M]}(\vec{x}, y) \right| + \lambda \|f\|_k^2 \\ &\leq \int \ell_M(\vec{x}, y, f_M(\vec{x})) dP^{[M]}(\vec{x}, y) + \lambda \liminf_M \|f_M\|_M^2 + \epsilon, \end{aligned}$$

where we used Lemma 2.4 in the last inequality.

For the  $\Gamma$ -lim sup-inequality, let  $f \in H_k$  be arbitrary and let  $(f_M)_M$  be the recovery sequence from Lemma 2.5. The desired inequality then follows by repeating the arguments from above.

Finally, using exactly the same argument as in the proof of Proposition 4.3 shows that  $\|f_{M, \lambda}^*\|_M \leq \sqrt{\frac{NC\epsilon}{\lambda}}$ , so we can apply Proposition B.3 and the result follows.  $\square$

*Proof. of Proposition 4.7* Let  $(\epsilon_n)_n \subseteq \mathbb{R}_{>0}$  with  $\epsilon_n \searrow 0$ . We construct a strictly increasing sequence  $(M_n)_n$  such that

$$\left| \mathcal{R}_{\ell_{M_n}, P^{[M_n]}}^{H_{M_n}^*} - \mathcal{R}_{\ell, P}^{H_k^*} \right| \leq \epsilon_n$$

for all  $n \in \mathbb{N}_+$ .

We start with  $n = 1$ : Since  $A_2(0) = 0$  and  $A_2$  is continuous in 0, cf. [30, Lemma 5.15], there exists  $\lambda'_1 \in \mathbb{R}_{>0}$  such that  $A_2(\lambda) \leq \frac{\epsilon_1}{3}$  for all  $0 < \lambda \leq \lambda'_1$ . From Assumption 4.6 we get  $\lambda''_1 \in \mathbb{R}_{>0}$  such that for all  $M \in \mathbb{N}_+$  we have  $A_2^{[M]}(\lambda) \leq \frac{\epsilon_1}{3}$  for all  $0 < \lambda \leq \lambda''_1$ . Define now  $\lambda_1 = \min\{\lambda'_1, \lambda''_1\}$ , and observe that  $\lambda_1 > 0$ . Proposition 4.5 ensures the existence of a strictly increasing sequence  $(M_m^{(1)})_m \subseteq \mathbb{N}_+$  with

$$\mathcal{R}_{\ell_{M_m^{(1)}}, P^{[M_m^{(1)]}, \lambda_1}}^{H_{M_m^{(1)}}^*} \rightarrow \mathcal{R}_{\ell, P, \lambda_1}^{H_k^*}$$

for  $m \rightarrow \infty$ . Choose  $m_1 \in \mathbb{N}_+$  such that for all  $m \geq m_1$  we have

$$\left| \mathcal{R}_{\ell_{M_m^{(1)}}, P^{[M_m^{(1)]}, \lambda_1}}^{H_{M_m^{(1)}}^*} - \mathcal{R}_{\ell, P, \lambda_1}^{H_k^*} \right| \leq \frac{\epsilon_1}{3}.$$

We now set  $M_1 = M_{m_1}^{(1)}$  and get that

$$\begin{aligned} \left| \mathcal{R}_{\ell_{M_1}, P^{[M_1]}}^{H_{M_1}^*} - \mathcal{R}_{\ell, P}^{H_k^*} \right| &\leq \left| \mathcal{R}_{\ell_{M_{m_1}^{(1)}}, P^{[M_{m_1}^{(1)]}}^{H_{M_{m_1}^{(1)}}^*} - \mathcal{R}_{\ell_{M_{m_1}^{(1)}}, P^{[M_{m_1}^{(1)]}, \lambda_1}}^{H_{M_{m_1}^{(1)}}^*} \right| + \left| \mathcal{R}_{\ell_{M_{m_1}^{(1)}}, P^{[M_{m_1}^{(1)]}, \lambda_1}}^{H_{M_{m_1}^{(1)}}^*} - \mathcal{R}_{\ell, P, \lambda_1}^{H_k^*} \right| \\ &\quad + \left| \mathcal{R}_{\ell, P, \lambda_1}^{H_k^*} - \mathcal{R}_{\ell, P}^{H_k^*} \right| \\ &\leq A_2^{[M_{m_1}^{(1)}]}(\lambda_1) + \frac{\epsilon_1}{3} + A_2(\lambda_1) \\ &\leq \epsilon_1. \end{aligned}$$

We can now repeat the argument from above inductively: Suppose we have constructed our subsequence up to  $n \in \mathbb{N}_+$ , i.e.,  $M_1, \dots, M_n$ . Choose  $\lambda' \in \mathbb{R}_{>0}$  such that  $A_2(\lambda) \leq \frac{\epsilon_{n+1}}{3}$  for

all  $0 < \lambda \leq \lambda'$  (exists due to continuity), and  $\lambda'' \in \mathbb{R}_{>0}$  such that for all  $M \in \mathbb{N}_+$  we have  
 $A_2^{[M]}(\lambda) \leq \frac{\epsilon_{n+1}}{3}$  for all  $0 < \lambda \leq \lambda''$  (using Assumption 4.6). Define now  $\lambda_{n+1} = \min\{\lambda', \lambda''\}$ ,  
and observe that  $\lambda_{n+1} > 0$ . Proposition 4.5 ensures the existence of a strictly increasing sequence  
 $(M_m^{(n+1)})_m$  such that

$$\mathcal{R}_{\ell_{M_m^{(n+1)}}, P^{[M_m^{(n+1)]}], \lambda_{n+1}}^{H_{M_m^{(n+1)}} *} \rightarrow \mathcal{R}_{\ell, P, \lambda_{n+1}}^{H_k^*}$$

for  $m \rightarrow \infty$ . Choose  $m_{n+1}$  such that for all  $m \geq m_{n+1}$  we have

$$\left| \mathcal{R}_{\ell_{M_m^{(n+1)}}, P^{[M_m^{(n+1)]}], \lambda_{n+1}}^{H_{M_m^{(n+1)}} *} - \mathcal{R}_{\ell, P, \lambda_{n+1}}^{H_k^*} \right| \leq \frac{\epsilon_{n+1}}{3}.$$

Define now  $M_{n+1} = \max\{M_n + 1, M_{m_{n+1}}^{(n+1)}\}$ , then we get

$$\begin{aligned} \left| \mathcal{R}_{\ell_{M_{n+1}}, P^{[M_{n+1}]}}^{H_{M_{n+1}}} - \mathcal{R}_{\ell, P}^{H_k^*} \right| &\leq \left| \mathcal{R}_{\ell_{M_{m_{n+1}}^{(n+1)}}, P^{[M_{m_{n+1}}^{(n+1)]}], \lambda_{n+1}}^{H_{M_{m_{n+1}}^{(n+1)}} *} - \mathcal{R}_{\ell_{M_{m_{n+1}}^{(n+1)}}, P^{[M_{m_{n+1}}^{(n+1)]}], \lambda_{n+1}}^{H_{M_{m_{n+1}}^{(n+1)}} *} \right| \\ &\quad + \left| \mathcal{R}_{\ell_{M_{m_{n+1}}^{(n+1)}}, P^{[M_{m_{n+1}}^{(n+1)]}], \lambda_{n+1}}^{H_{M_{m_{n+1}}^{(n+1)}} *} - \mathcal{R}_{\ell, P, \lambda_{n+1}}^{H_k^*} \right| \\ &\quad + \left| \mathcal{R}_{\ell, P, \lambda_{n+1}}^{H_k^*} - \mathcal{R}_{\ell, P}^{H_k^*} \right| \\ &\leq A_2^{M_{m_{n+1}}^{(n+1)}}(\lambda_{n+1}) + \frac{\epsilon_{n+1}}{3} + A_2(\lambda_{n+1}) \\ &\leq \epsilon_{n+1}. \end{aligned}$$

The resulting sequence  $(M_n)_n$  fulfills then

$$\mathcal{R}_{\ell_{M_n}, P^{[M_n]}}^{H_{M_n}} \rightarrow \mathcal{R}_{\ell, P}^{H_k^*}$$

for  $n \rightarrow \infty$ . □

## B Additional technical results

In this section we state and prove two technical results that play an important role in the proofs of the main results.

### B.1 A characterization of RKHS functions

Here we recall the following characterization of RKHS functions from [3, Section I.4]. Let  $\mathcal{X} \neq \emptyset$  be arbitrary. For  $k : \mathcal{X} \times \mathcal{X} \rightarrow \mathbb{R}$  symmetric and positive semidefinite and some  $f \in \mathbb{R}^{\mathcal{X}}$  as well as  $N \in \mathbb{N}_+$ ,  $\vec{x} \in \mathcal{X}^N$ ,  $\vec{\alpha} \in \mathbb{R}^N$  define

$$\begin{aligned} \mathcal{E}(\vec{x}, \vec{\alpha}, f) &= \sum_{n=1}^N \alpha_n f(x_n) \\ \mathcal{W}(\vec{x}, \vec{\alpha}, k) &= \sqrt{\sum_{i,j=1}^N \alpha_i \alpha_j k(x_j, x_i)}, \end{aligned}$$

where we might omit some arguments if they are clear. Furthermore, define

$$\mathcal{D}(\vec{x}, \vec{\alpha}, f, k) = \begin{cases} \frac{\mathcal{E}(\vec{x}, \vec{\alpha}, f)}{\mathcal{W}(\vec{x}, \vec{\alpha}, k)} & \text{if } \mathcal{E}(\vec{x}, \vec{\alpha}, f) \neq 0, \mathcal{W}(\vec{x}, \vec{\alpha}, k) \neq 0 \\ 0 & \text{if } \mathcal{E}(\vec{x}, \vec{\alpha}, f) = \mathcal{W}(\vec{x}, \vec{\alpha}, k) = 0 \\ \infty & \text{if } \mathcal{E}(\vec{x}, \vec{\alpha}, f) \neq 0, \mathcal{W}(\vec{x}, \vec{\alpha}, k) = 0 \end{cases}$$

691 and

$$\mathcal{N}(f, k) = \sup_{\substack{(\vec{x}, \vec{\alpha}) \in \mathcal{X}^N \times \mathbb{R}^N \\ N \in \mathbb{N}_+}} \mathcal{D}(\vec{x}, \vec{\alpha}, f, k).$$

692 We collect now some simple facts that will be used repeatedly.

693 Let  $\vec{x} \in \mathcal{X}^N$ ,  $\vec{\alpha} \in \mathbb{R}^N$ ,  $N \in \mathbb{N}_+$ , be arbitrary, and define

$$f = \sum_{n=1}^N \alpha_n k(\cdot, x_n) \in H_k^{\text{pre}}.$$

694 1. By construction,  $\mathcal{W}(\vec{x}, \vec{\alpha}, k) \in \mathbb{R}_{\geq 0}$  (recall that  $k$  is positive semidefinite).

695 2. Since  $f \in H_k^{\text{pre}}$ , its RKHS norm has an explicit form and we find

$$\|f\|_k = \sqrt{\sum_{i,j=1}^N \alpha_i \alpha_j k(x_j, x_i)} = \mathcal{W}(\vec{x}, \vec{\alpha}, k).$$

696 This also implies that  $f \equiv 0$  if and only if  $\mathcal{W}(\vec{x}, \vec{\alpha}, k) = 0$ .

697 3. If  $\mathcal{W}(\vec{x}, \vec{\alpha}, k) > 0$ , then

$$\begin{aligned} \mathcal{D}(\vec{x}, \vec{\alpha}, f, k) &= \frac{\mathcal{E}(\vec{x}, \vec{\alpha}, f)}{\mathcal{W}(\vec{x}, \vec{\alpha}, k)} \\ &= \frac{\sum_{i=1}^N \alpha_i f(x_i)}{\sqrt{\sum_{i,j=1}^N \alpha_i \alpha_j k(x_j, x_i)}} \\ &= \frac{\sum_{i,j=1}^N \alpha_i \alpha_j k(x_j, x_i)}{\sqrt{\sum_{i,j=1}^N \alpha_i \alpha_j k(x_j, x_i)}} \\ &= \frac{\mathcal{W}(\vec{x}, \vec{\alpha}, k)^2}{\mathcal{W}(\vec{x}, \vec{\alpha}, k)} = \mathcal{W}(\vec{x}, \vec{\alpha}, k). \end{aligned}$$

698 We can now state the characterization result.

699 **Theorem B.1.** Let  $k : \mathcal{X} \times \mathcal{X} \rightarrow \mathbb{R}$  be a kernel and  $f \in \mathbb{R}^{\mathcal{X}}$ . Then  $f \in H_k$  if and only if  
700  $\mathcal{N}(f, k) < \infty$ . If  $f \in H_k$ , then  $\|f\|_k = \mathcal{N}(f, k)$ .

701 For convenience, we provide a full self-contained proof of this result.

702 *Proof. Step 1* First, we show that for  $f \in H_k$ , we have  $\|f\|_k = \mathcal{N}(f, k)$ .

703  $\mathcal{N}(f, k) \leq \|f\|_k$ : Let  $N \in \mathbb{N}_+$  and  $(\vec{x}, \vec{\alpha}) \in \mathcal{X}^N \times \mathbb{R}^N$  be arbitrary. Observe that

$$\begin{aligned} \mathcal{E}(\vec{x}, \vec{\alpha}, f) &= \sum_{n=1}^N \alpha_n f(x_n) \\ &= \sum_{n=1}^N \alpha_n \langle f, k(\cdot, x_n) \rangle_k \\ &= \langle f, \sum_{n=1}^N \alpha_n k(\cdot, x_n) \rangle_k \\ &\leq \|f\|_k \left\| \sum_{n=1}^N \alpha_n k(\cdot, x_n) \right\|_k \\ &= \|f\|_k \mathcal{W}(\vec{x}, \vec{\alpha}, k). \end{aligned}$$

704 If  $\mathcal{W}(\vec{x}, \vec{\alpha}, k) = \left\| \sum_{n=1}^N \alpha_n k(\cdot, x_n) \right\|_k = 0$ , then  $\sum_{n=1}^N \alpha_n k(\cdot, x_n) = 0_{H_k}$ , hence  $\mathcal{E}(\vec{x}, \vec{\alpha}, f) =$   
705  $\langle f, 0_{H_k} \rangle_k = 0$  and by definition  $\mathcal{D}(\vec{x}, \vec{\alpha}, f, k) = 0 \leq \|f\|_k$ .

706 If  $\mathcal{W}(\vec{x}, \vec{\alpha}, k) > 0$ , we can rearrange to get

$$\frac{\mathcal{E}(\vec{x}, \vec{\alpha}, f)}{\mathcal{W}(\vec{x}, \vec{\alpha}, k)} = \mathcal{D}(\vec{x}, \vec{\alpha}, f, k) \leq \|f\|_k.$$

707 Since  $(\vec{x}, \vec{\alpha})$  was arbitrary, we find that  $\mathcal{N}(\vec{x}, \vec{\alpha}, f, k) \leq \|f\|_k$ .

708  $\mathcal{N}(f, k) \geq \|f\|_k$ : Let  $\epsilon > 0$  and choose  $f_\epsilon = \sum_{n=1}^N \alpha_n k(\cdot, x_n) \in H_k^{\text{pre}}$  such that  $\|f - f_\epsilon\|_k < \epsilon$ .  
 709 If  $\mathcal{W}(\vec{x}, \vec{\alpha}, k) = \|f_\epsilon\|_k = 0$ , then  $f_\epsilon = 0_{H_k}$  and hence  $\mathcal{E}(\vec{x}, \vec{\alpha}, f) = \langle f, f_\epsilon \rangle_k = \langle f, 0_{H_k} \rangle_k = 0$ . By  
 710 definition, this then shows

$$\mathcal{D}(\vec{x}, \vec{\alpha}, f) = 0 = \|f_\epsilon\|_k \geq \|f\|_k - \epsilon.$$

711 Before we continue, note that for all  $f_1, f_2 \in H_k$  we have

$$\begin{aligned} |\mathcal{E}(\vec{x}, \vec{\alpha}, f_1) - \mathcal{E}(\vec{x}, \vec{\alpha}, f_2)| &= \left| \sum_{n=1}^N \alpha_n (f_1(x_n) - f_2(x_n)) \right| \\ &= \left| \sum_{n=1}^N \alpha_n \langle f_1 - f_2, k(\cdot, x_n) \rangle_k \right| \\ &= \left| \langle f_1 - f_2, \sum_{n=1}^N \alpha_n k(\cdot, x_n) \rangle_k \right| \\ &\leq \|f_1 - f_2\|_k \|f_\epsilon\|_k. \end{aligned}$$

712 Assume now that  $\mathcal{W}(\vec{x}, \vec{\alpha}, k) > 0$ , then we get

$$\begin{aligned} \mathcal{D}(\vec{x}, \vec{\alpha}, f, k) &= \frac{\mathcal{E}(\vec{x}, \vec{\alpha}, f)}{\mathcal{W}(\vec{x}, \vec{\alpha}, k)} \\ &\geq \frac{\mathcal{E}(\vec{x}, \vec{\alpha}, f_\epsilon)}{\mathcal{W}(\vec{x}, \vec{\alpha}, k)} - \frac{\|f - f_\epsilon\|_k \|f_\epsilon\|_k}{\mathcal{W}(\vec{x}, \vec{\alpha}, k)} \\ &\geq \frac{\mathcal{E}(\vec{x}, \vec{\alpha}, f_\epsilon)}{\mathcal{W}(\vec{x}, \vec{\alpha}, k)} - \frac{\epsilon \|f_\epsilon\|_k}{\mathcal{W}(\vec{x}, \vec{\alpha}, k)} \\ &= \mathcal{W}(\vec{x}, \vec{\alpha}, k) - \epsilon \\ &= \|f_\epsilon\|_k - \epsilon \\ &\geq \|f\|_k - 2\epsilon \end{aligned}$$

713 Altogether, by definition of  $\mathcal{N}(f, k)$ , we get that

$$\mathcal{N}(f, k) \geq \mathcal{D}(\vec{x}, \vec{\alpha}, f, k) \geq \|f\|_k - 2\epsilon.$$

714 Since  $\epsilon > 0$  was arbitrary, we find that  $\mathcal{N}(f, k) \geq \|f\|_k$ .

715 **Step 2** Let  $f \in \mathbb{R}^{\mathcal{X}}$  be arbitrary. We show that if  $\mathcal{N}(f, k) < \infty$ , then

$$\begin{aligned} \ell_f : H_k^{\text{pre}} &\rightarrow \mathbb{R} \\ \sum_{n=1}^N \alpha_n k(\cdot, x_n) &\mapsto \sum_{n=1}^N \alpha_n f(x_n) \end{aligned}$$

716 is a well-defined, linear and continuous (w.r.t.  $\|\cdot\|_k$ ) map.

717 To establish the *well-posedness*, let  $(\vec{x}, \vec{\alpha}) \in \mathcal{X}^N \times \mathbb{R}^N$  and  $(\vec{y}, \vec{\beta}) \in \mathcal{X}^M \times \mathbb{R}^M$  such that

$$\sum_{n=1}^N \alpha_n k(\cdot, x_n) = \sum_{m=1}^M \beta_m k(\cdot, y_m) \in H_k^{\text{pre}}.$$

718 This implies that

$$\sum_{n=1}^N \alpha_n k(\cdot, x_n) + \sum_{m=1}^M (-\beta_m) k(\cdot, y_m) = 0_{H_k}$$

719 and hence  $\mathcal{W}((\vec{x}, \vec{y}), (\vec{\alpha}, -\vec{\beta}), k) = \|\sum_{n=1}^N \alpha_n k(\cdot, x_n) + \sum_{m=1}^M (-\beta_m) k(\cdot, y_m)\|_k = 0$ . Assume  
 720 now that

$$\sum_{n=1}^N \alpha_n f(x_n) \neq \sum_{m=1}^m \beta_m f(x_m),$$

721 then we get that

$$\sum_{n=1}^N \alpha_n f(x_n) + \sum_{m=1}^m (-\beta_m) f(x_m) = \mathcal{E}((\vec{x}, \vec{y}), (\vec{\alpha}, -\vec{\beta}), f) \neq 0$$

722 which by definition implies that  $\mathcal{D}((\vec{x}, \vec{y}), (\vec{\alpha}, -\vec{\beta}), f, k) = \infty$  and therefore  $\mathcal{N}(f, k) = \infty$ , a  
 723 contradiction.

724 The *linearity* is then clear. Finally, to show the *continuity*, let  $H_k^{\text{pre}} \ni f_0 = \sum_{n=1}^N \alpha_n k(\cdot, x_n)$  be  
 725 arbitrary and set  $\vec{x} = (x_1 \ \cdots \ x_N)$ ,  $\vec{\alpha} = (\alpha_1 \ \cdots \ \alpha_N)$ , then

$$\begin{aligned} |\ell_f(f_0)| &= \left| \sum_{n=1}^N \alpha_n f(x_n) \right| \\ &= |\mathcal{E}(\vec{x}, \vec{\alpha}, f)| \\ &\leq \mathcal{N}(f, k) \mathcal{W}(\vec{x}, \vec{\alpha}, k) \\ &= \mathcal{N}(f, k) \|f_0\|_k. \end{aligned}$$

726 Since  $\mathcal{N}(f, k)$  is finite and independent of  $f_0$ , and  $\ell_f$  is a linear map, this shows the continuity of  $\ell_f$ .

727 **Step 3** Let  $f \in \mathbb{R}^{\mathcal{X}}$  such that  $\mathcal{N}(f, k) < \infty$ . Since according to Step 2  $\ell_f$  is a linear and continuous  
 728 map on  $H_k^{\text{pre}}$  and the latter is dense in  $H_k$ , there exists a unique linear and continuous extension  
 729  $\bar{\ell}_f : H_k \rightarrow \mathbb{R}$  of  $\ell_f$ . Furthermore, from the Riesz Representation Theorem there exists a unique  
 730  $\hat{f} \in H_k$  with  $\bar{\ell}_f = \langle \cdot, \hat{f} \rangle_k$ . For all  $x \in \mathcal{X}$  we then get

$$\begin{aligned} \hat{f}(x) &= \langle \hat{f}, k(\cdot, x) \rangle_k \\ &= \langle k(\cdot, x), \hat{f} \rangle_k \\ &= \bar{\ell}_f(k(\cdot, x)) \\ &= \ell_f(k(\cdot, x)) \\ &= f(x), \end{aligned}$$

731 hence  $f = \hat{f} \in H_k$ . □

## 732 B.2 A $\Gamma$ -convergence argument

733 We use repeatedly the concept of  $\Gamma$ -convergence, see for example [16]. For convenience, in this  
 734 section we summarize the well-known and standard main argument, roughly following [5, Chapter 5].

735 **Definition B.2.** Let  $F_M : H_M \rightarrow \mathbb{R} \cup \{\infty\}$  and  $F : H_k \rightarrow \mathbb{R} \cup \{\infty\}$ . We say that  $F_M$   $\Gamma$ -converges  
 736 to  $F$  and write  $F_M \xrightarrow{\Gamma} F$ , if

737 1. For all sequences  $(f_M)_M$ ,  $f_M \in H_M$ , with  $f_M \xrightarrow{\mathcal{P}_1} f$  for some  $f \in H_k$ , we have

$$F(f) \leq \liminf_M F_M(f_M).$$

738 2. For all  $f \in H_k$  there exists a sequence  $(f_M)_M$  with  $f_M \in H_M$  such that  $f_M \xrightarrow{\mathcal{P}_1} f$  and

$$F(f) \geq \limsup_M F_M(f_M).$$

739 The sequence in the second item is commonly called a *recovery sequence* (for  $f$ ).

740 **Proposition B.3.** Let  $F_M \xrightarrow{\Gamma} F$  and  $f_M^* \in \operatorname{argmin}_{f \in H_M} F_M(f)$  for all  $M \in \mathbb{N}$  (in particular, all  
 741 the minima are attained). If there exists  $B \in \mathbb{R}_{\geq 0}$  such that  $\|f_M^*\|_M \leq B$  for all  $M \in \mathbb{N}$ , then there  
 742 exists a subsequence  $(f_{M_\ell}^*)_\ell$  and  $f^* \in H_k$  such that  $f_{M_\ell}^* \xrightarrow{\mathcal{P}_1} f^*$ . Furthermore,  $F_{M_\ell}(f_{M_\ell}^*) \rightarrow F(f^*)$ .

743 *Proof.* From Theorem 2.3 we get the existence of  $(f_{M_\ell}^*)_\ell$  and  $f^* \in H_k$ , and that  $f_{M_\ell}^* \xrightarrow{\mathcal{P}_1} f^*$ . Let  
 744  $f \in H_k$  be arbitrary and let  $(f_M)_M$  be a recovery sequence for  $f$ . We then have

$$\begin{aligned} F(f) &\geq \limsup_M F_M(f_M) \\ &\geq \limsup_{M_\ell} F_{M_\ell}(f_{M_\ell}) \\ &\geq \liminf_{M_\ell} F_{M_\ell}(f_{M_\ell}) \\ &\geq \liminf_{M_\ell} F_{M_\ell}(f_{M_\ell}^*) \\ &\geq F(f^*), \end{aligned}$$

745 where we used the lim sup-inequality of  $\Gamma$ -convergence in the first step, standard properties of  
 746 lim sup and lim inf in the second and third step, the fact that  $f_{M_\ell}^*$  is a minimizer of  $F_{M_\ell}$  in the fourth  
 747 step, and finally the lim inf-inequality of  $\Gamma$ -convergence. Since  $f \in H_k$  was arbitrary, this shows that  
 748  $f^*$  is a minimizer of  $F$ .

749 Furthermore, let  $(f_M)_M$  be a recovery sequence for  $f^*$ , then

$$\begin{aligned} F(f^*) &\geq \limsup_M F_M(f_M) \\ &\geq \limsup_\ell F_{M_\ell}(f_{M_\ell}) \\ &\geq \limsup_\ell F_{M_\ell}(f_{M_\ell}^*), \end{aligned}$$

750 where we used the lim sup-inequality in the first step, an elementary property of lim sup in the  
 751 second step, and finally that  $f_{M_\ell}^*$  is a minimizer of  $F_{M_\ell}$ . Since  $f_{M_\ell}^* \xrightarrow{\mathcal{P}_1} f^*$ , the lim inf-inequality of  
 752  $\Gamma$ -convergence implies that

$$F(f^*) \leq \liminf_\ell F_{M_\ell}(f_{M_\ell}^*),$$

753 so we find that

$$\limsup_\ell F_{M_\ell}(f_{M_\ell}^*) \leq F(f^*) \leq \liminf_\ell F_{M_\ell}(f_{M_\ell}^*),$$

754 establishing that  $F_{M_\ell}(f_{M_\ell}^*) \rightarrow F(f^*)$ . □
